# Supplementary material for: Synthesis of Azuleno[2,1-b]quinolones and Quinolines via Brønsted Acid-Catalyzed Cyclization of 2-Arylaminoazulenes
Source: MDPI journal article supplement (doi:10.3390/molecules28155785), 2023-07-31
Supplement: s1 [file s1]

# Synthesis of Azuleno[2,1-*b*]quinolones and Quinolines via Brønsted Acid-catalyzed Cyclization of 2-Arylaminoazulenes

Taku Shoji \*, Mutsumi Takeuchi, Mayumi Uda, Yukino Ariga, Akari Yamazaki and Ryuta Sekiguchi, Shunji Ito

## ➤ Contents

1. Copies of  $^1\text{H}$  NMR and  $^{13}\text{C}$  NMR spectra of reported compounds. Figures S1–S50

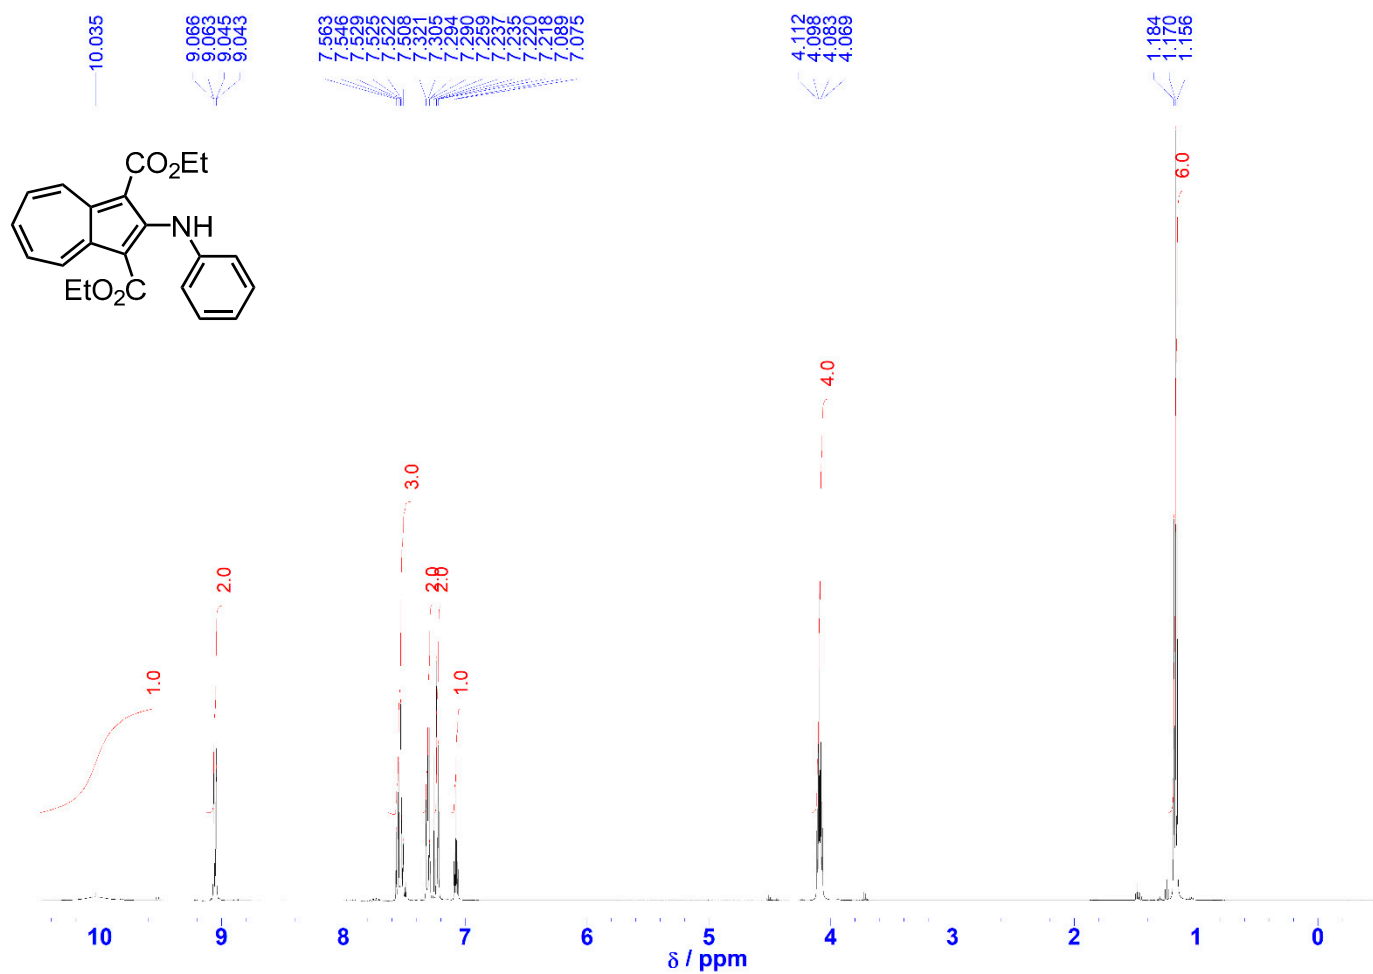

**Figure S1.**  $^1\text{H}$  NMR spectrum of **2a** in  $\text{CDCl}_3$  (500 MHz).

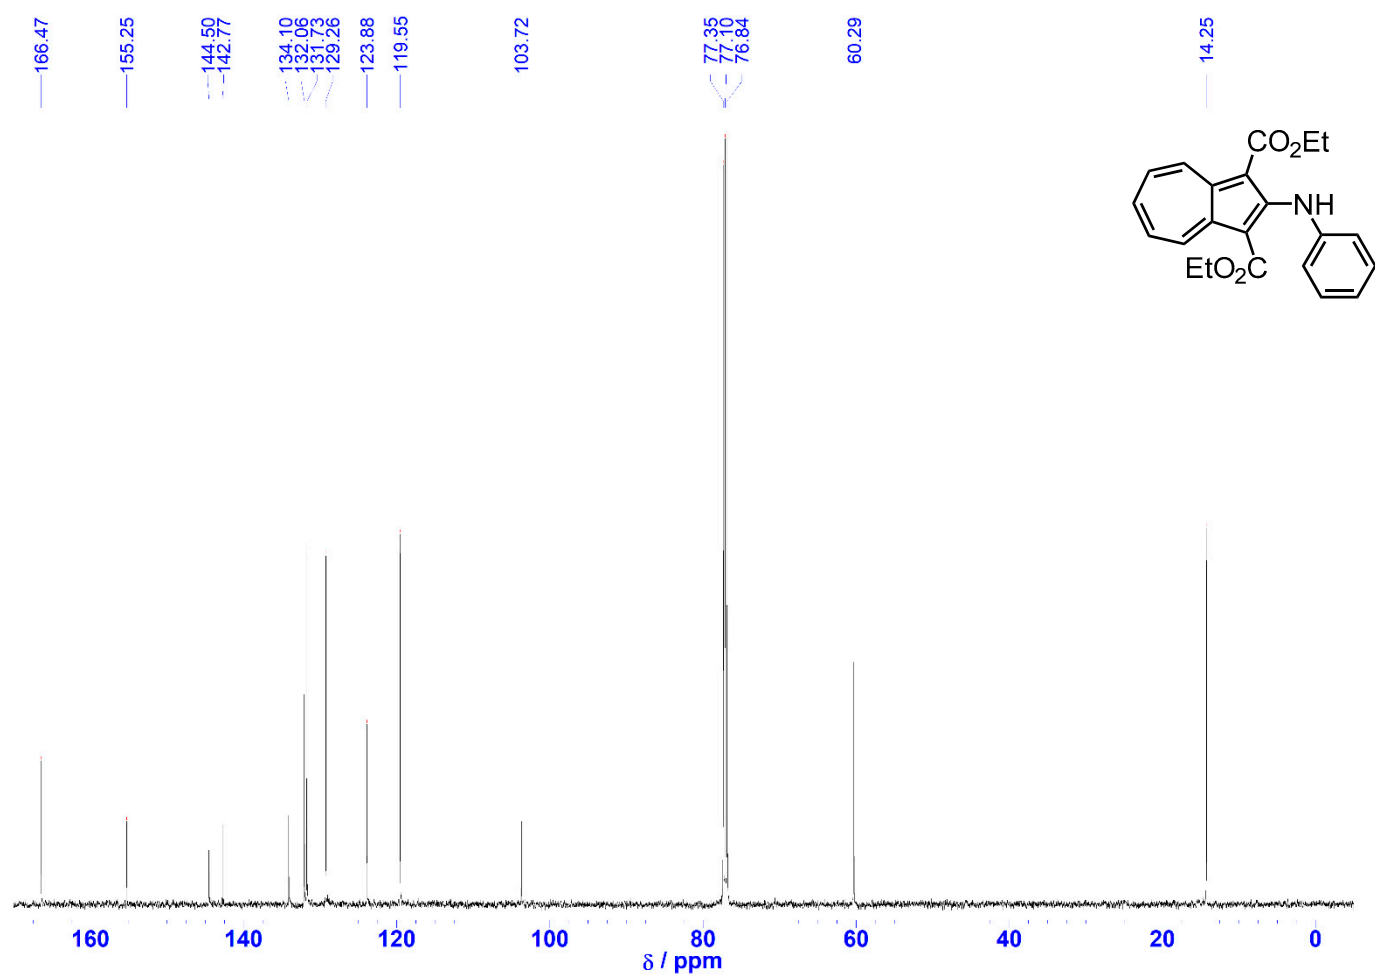

Figure S2.  $^{13}\text{C}$  NMR spectrum of **2a** in  $\text{CDCl}_3$  (125 MHz).

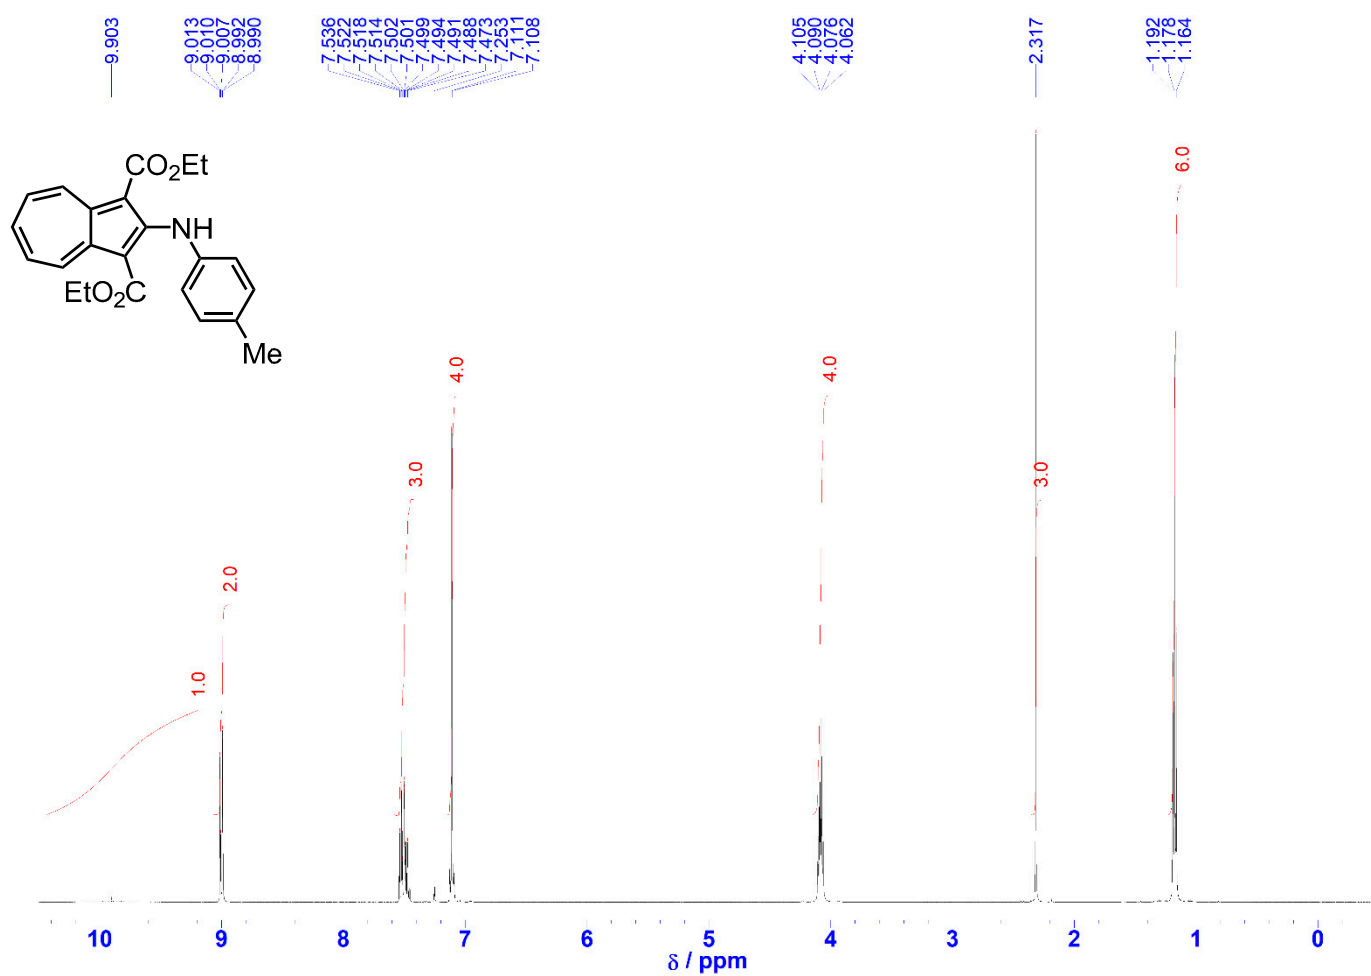

Figure S3.  $^1\text{H}$  NMR spectrum of **2b** in  $\text{CDCl}_3$  (500 MHz).

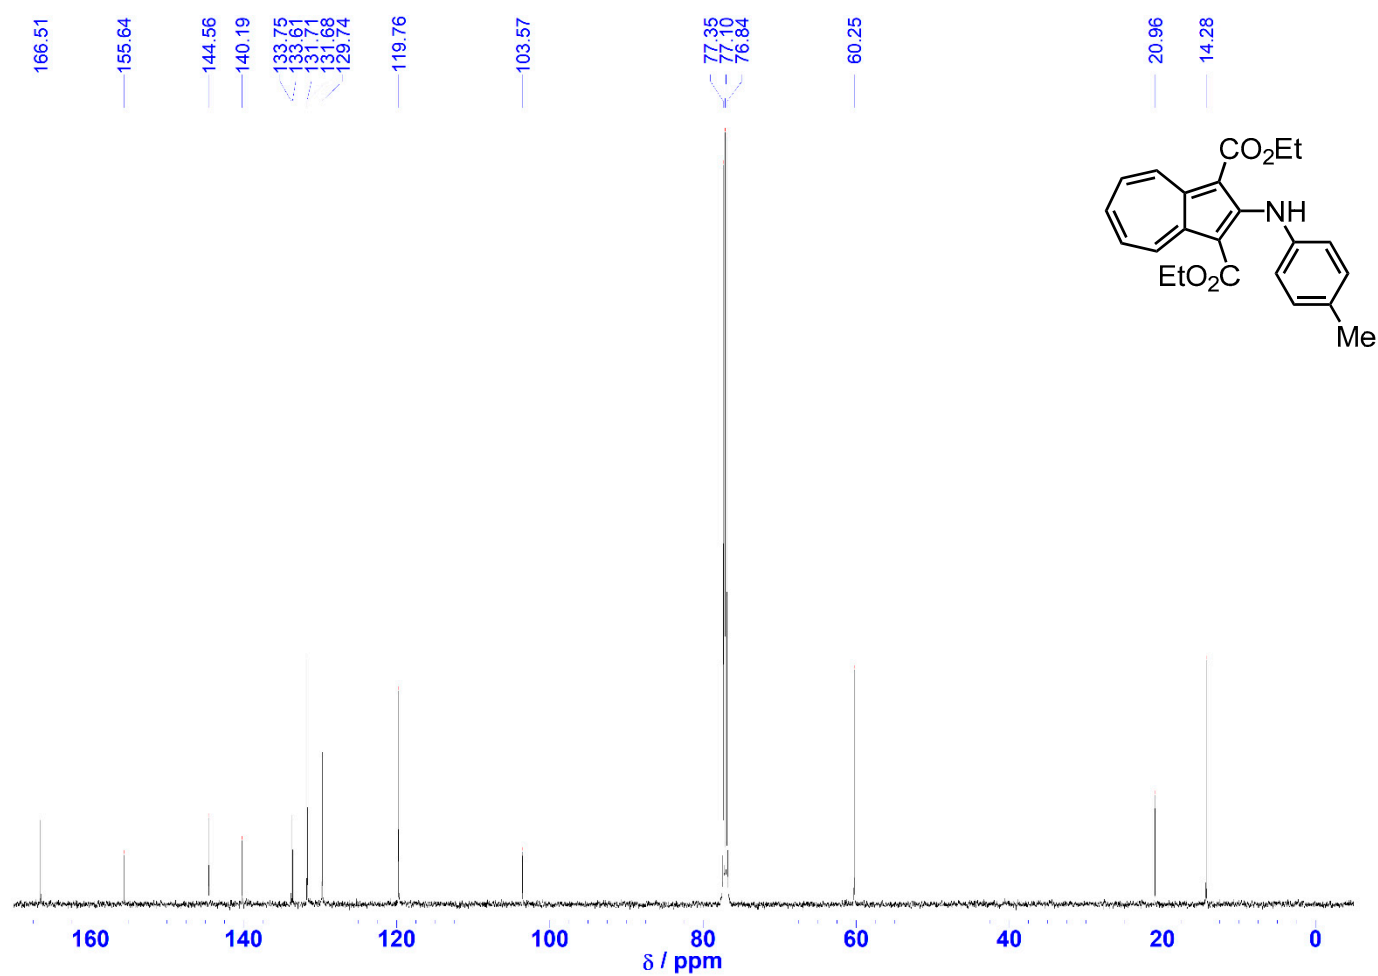

Figure S4.  $^{13}\text{C}$  NMR spectrum of **2b** in  $\text{CDCl}_3$  (125 MHz).

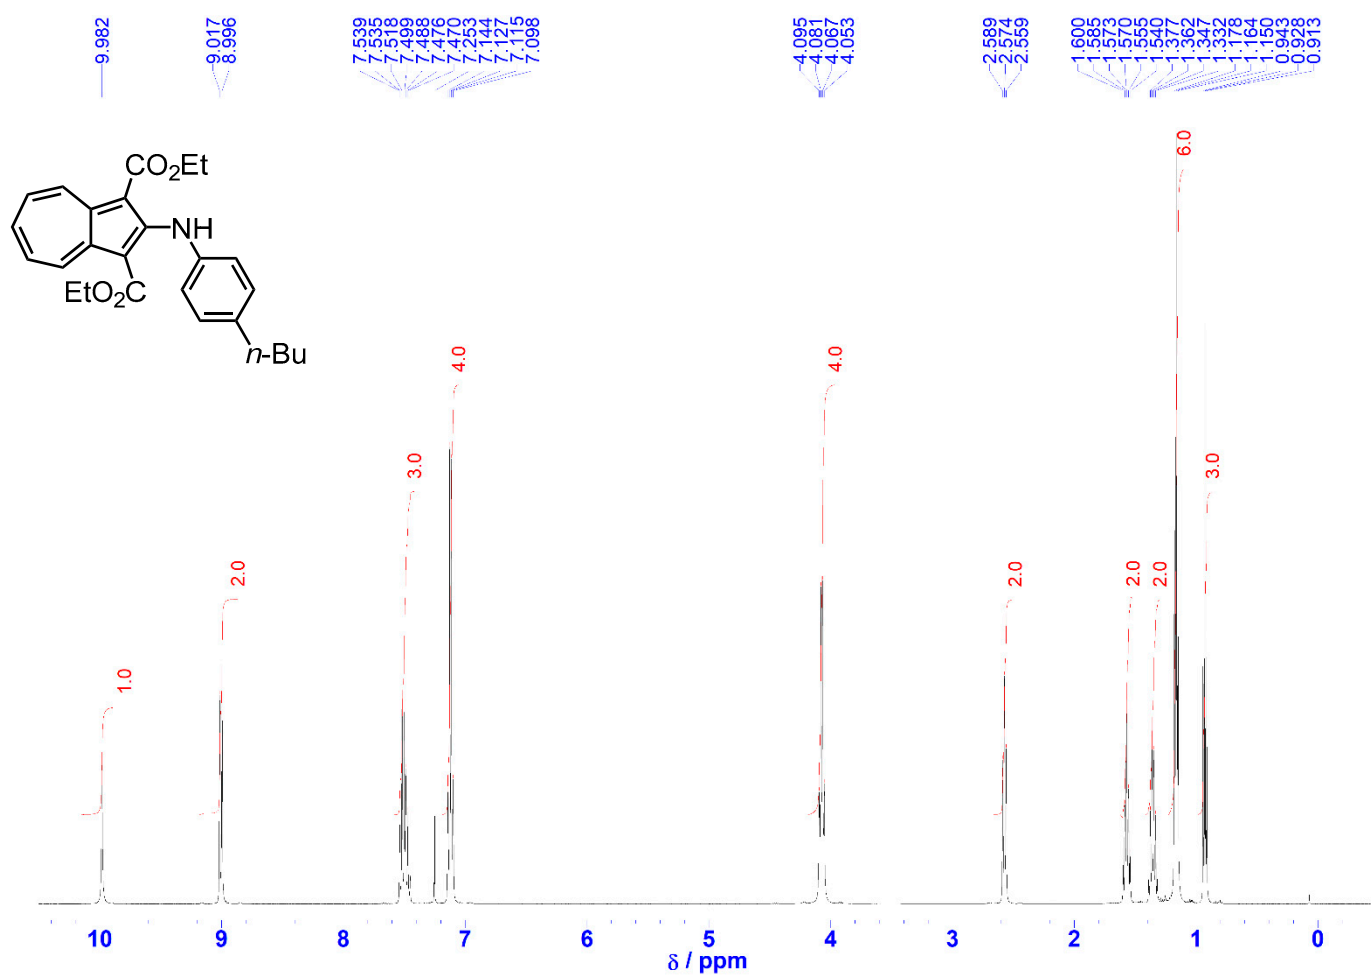

Figure S5.  $^1\text{H}$  NMR spectrum of **2c** in  $\text{CDCl}_3$  (500 MHz).

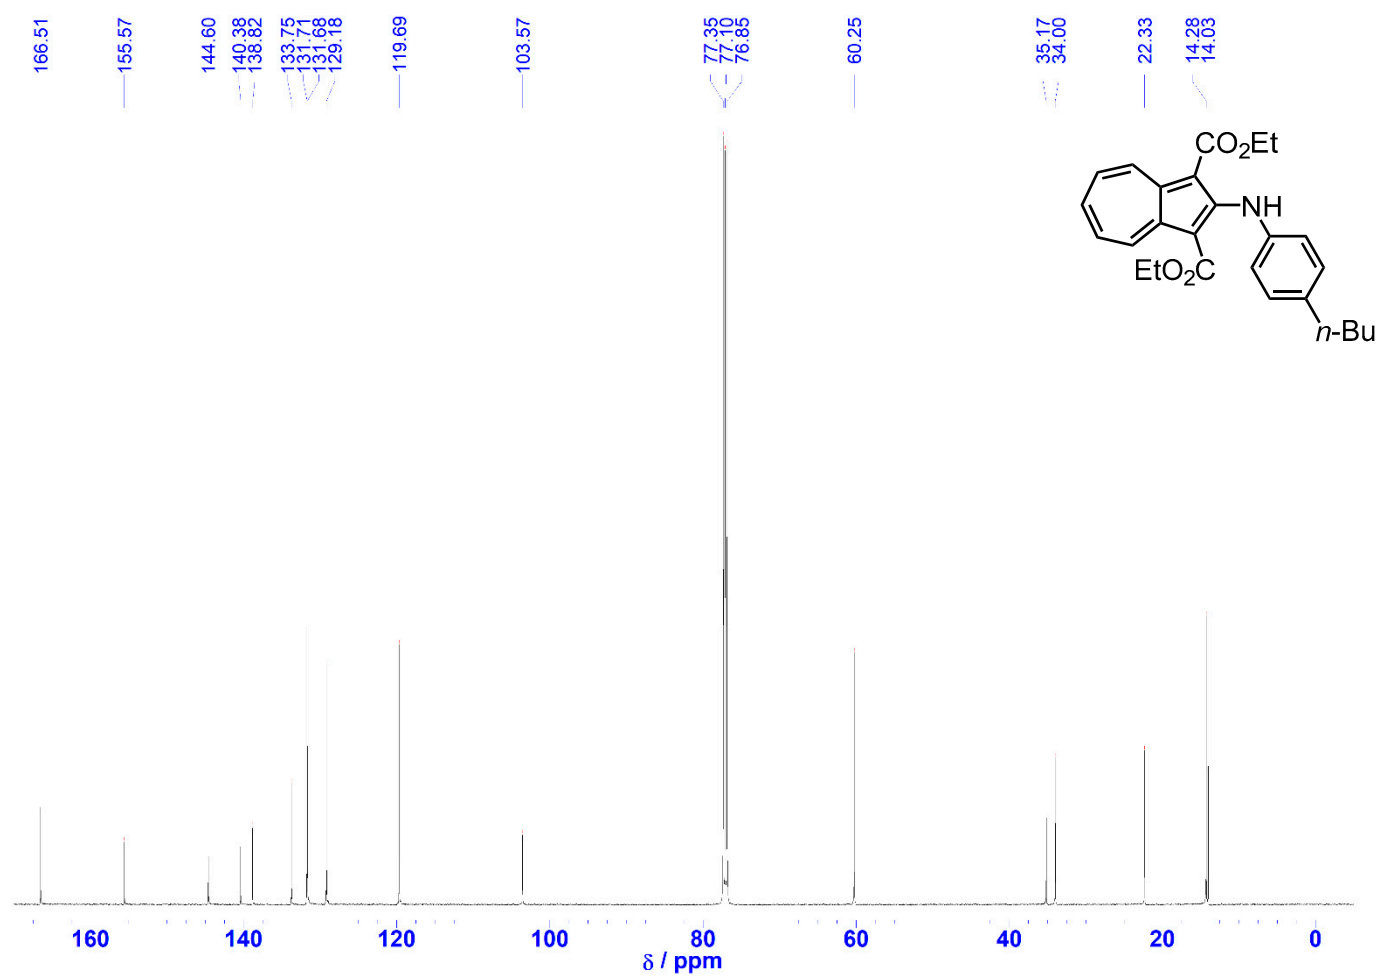

Figure S6.  $^{13}\text{C}$  NMR spectrum of **2c** in  $\text{CDCl}_3$  (125 MHz).

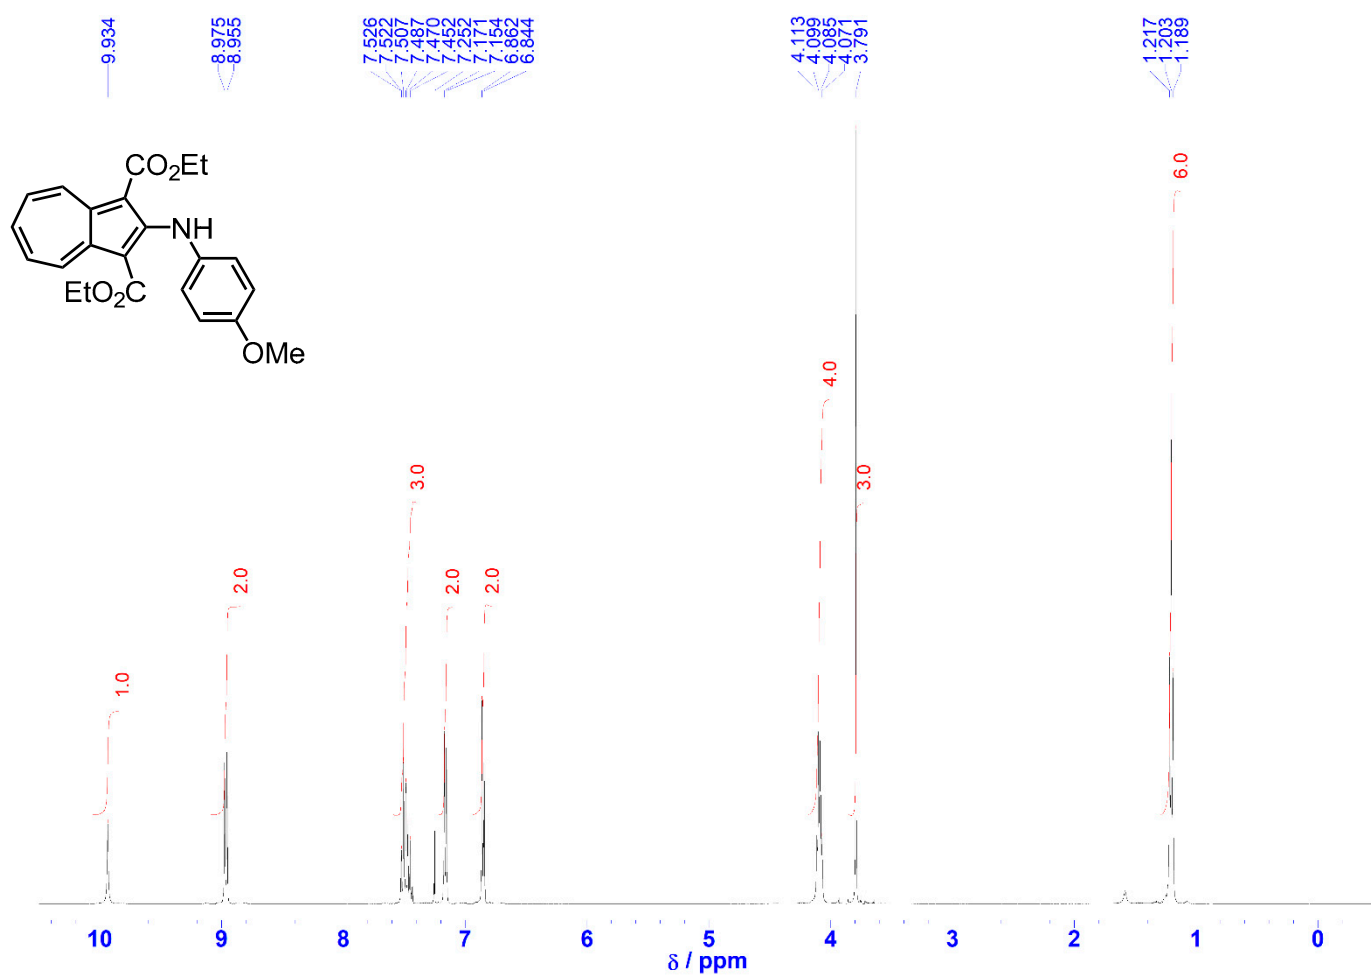

Figure S7. <sup>1</sup>H NMR spectrum of **2d** in CDCl<sub>3</sub> (500 MHz).

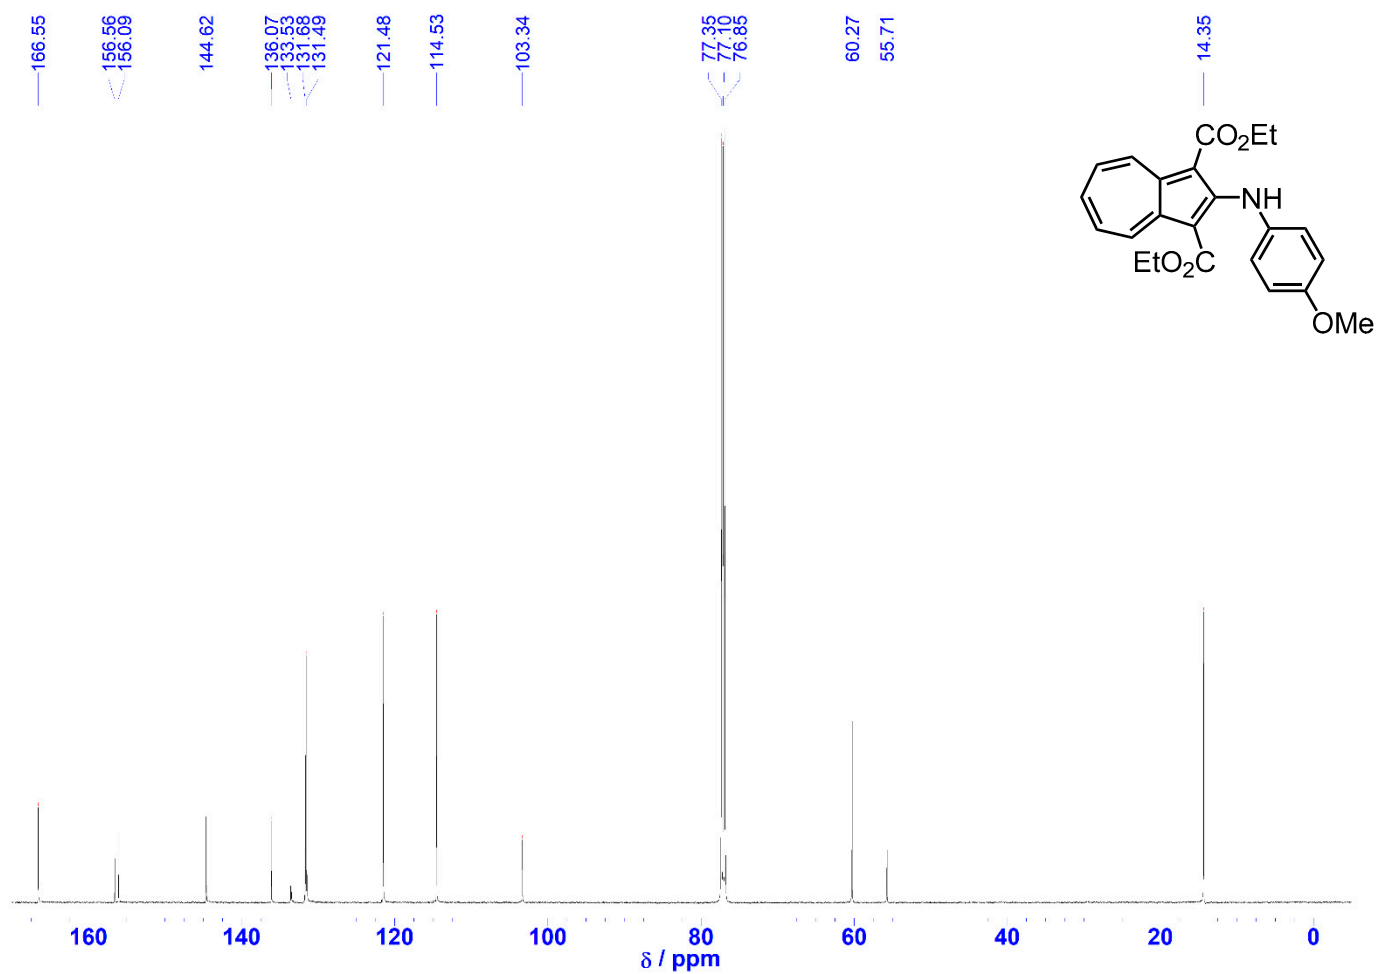

Figure S8.  $^{13}\text{C}$  NMR spectrum of **2d** in  $\text{CDCl}_3$  (125 MHz).

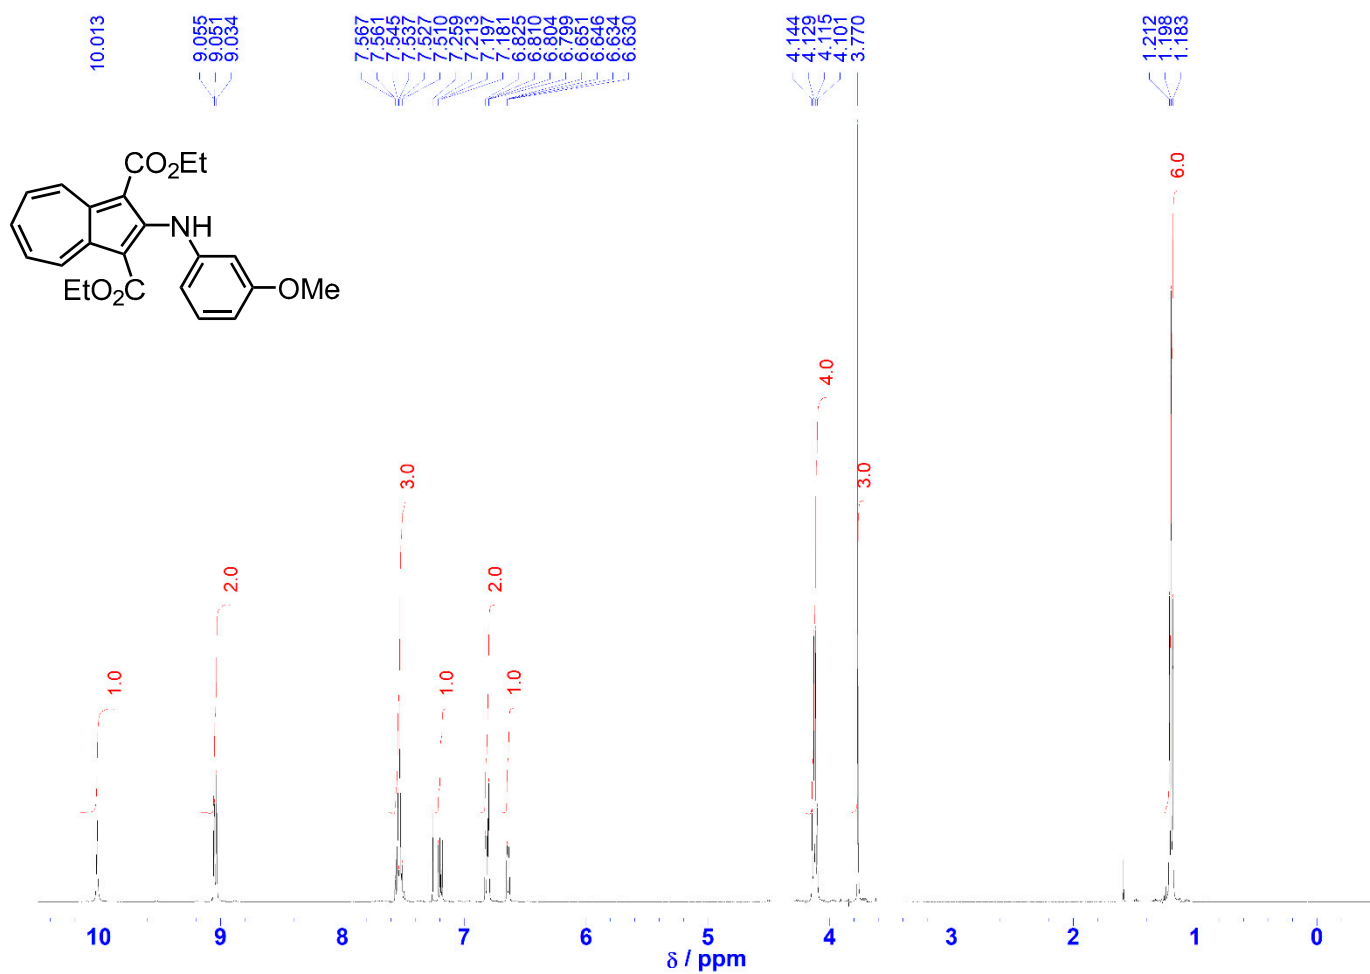

**Figure S9.** <sup>1</sup>H NMR spectrum of **2e** in CDCl<sub>3</sub> (500 MHz).

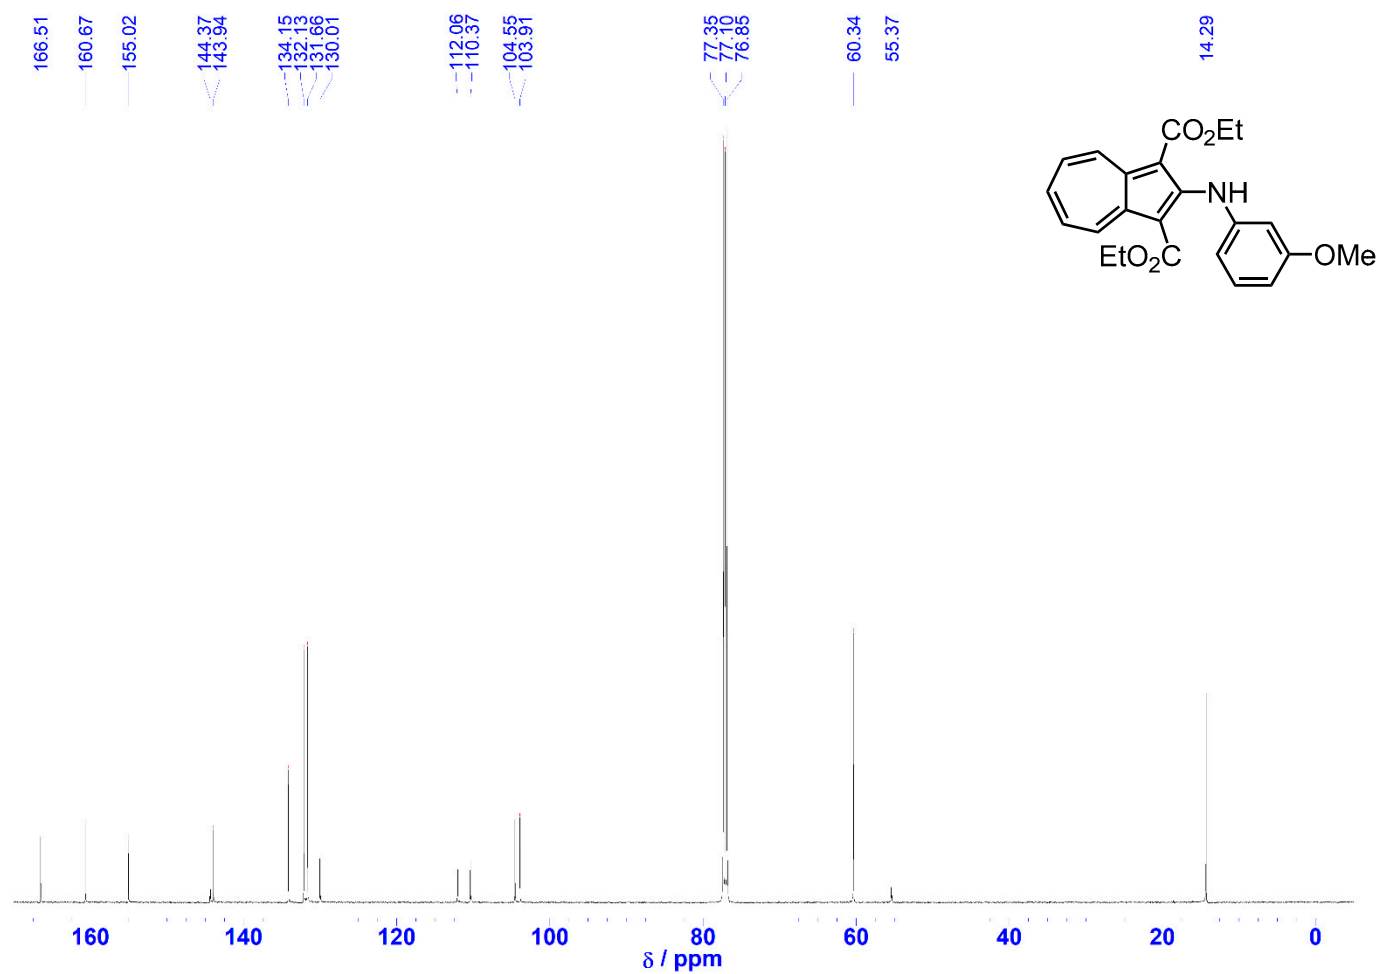

Figure S10.  $^{13}\text{C}$  NMR spectrum of **2e** in  $\text{CDCl}_3$  (125 MHz).

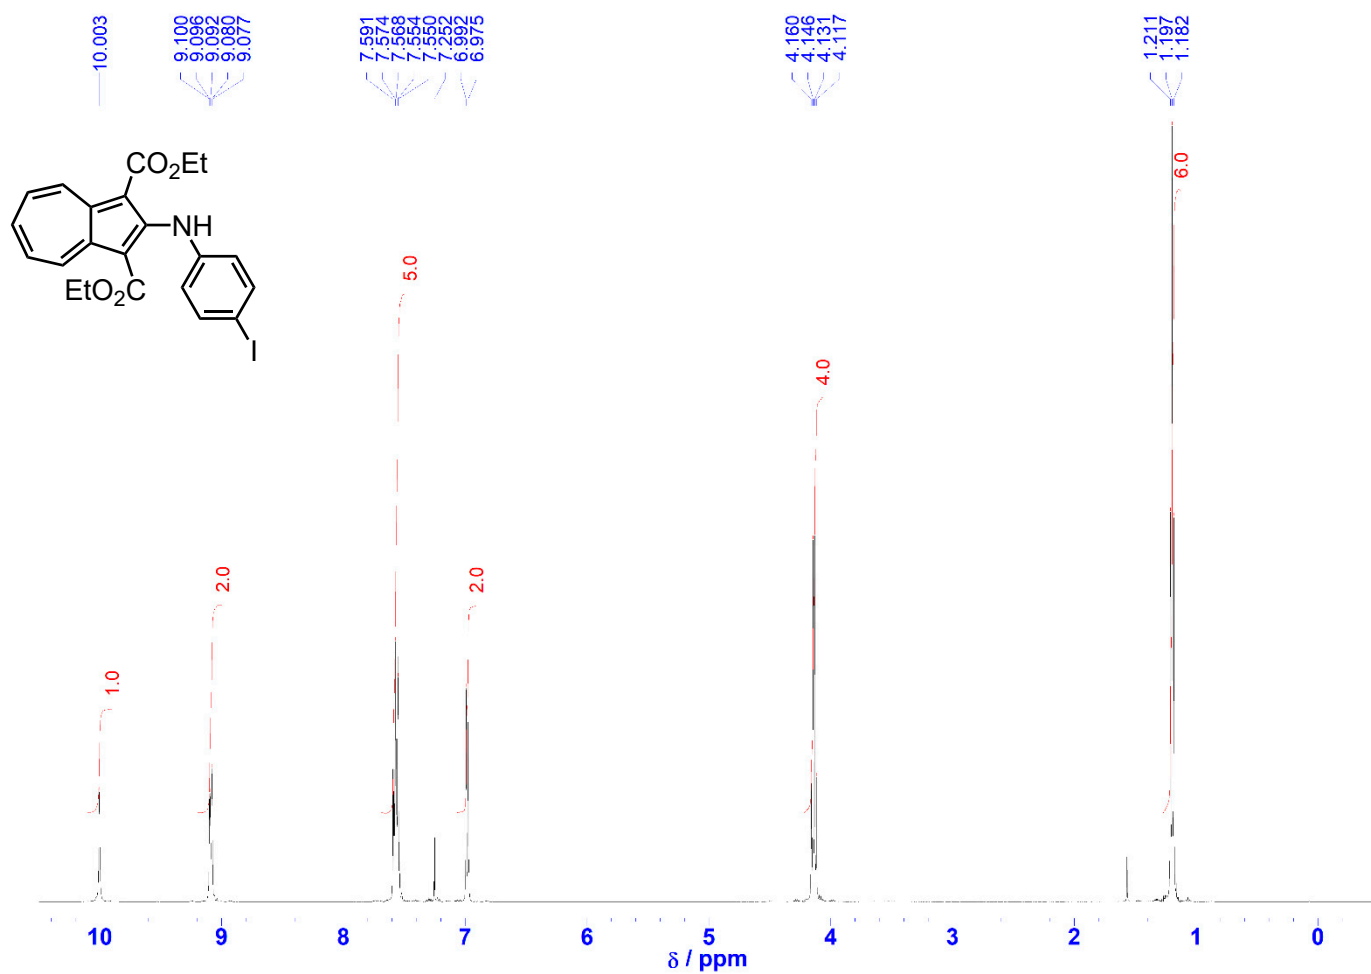

**Figure S11.**  $^1\text{H}$  NMR spectrum of **2f** in  $\text{CDCl}_3$  (500 MHz).

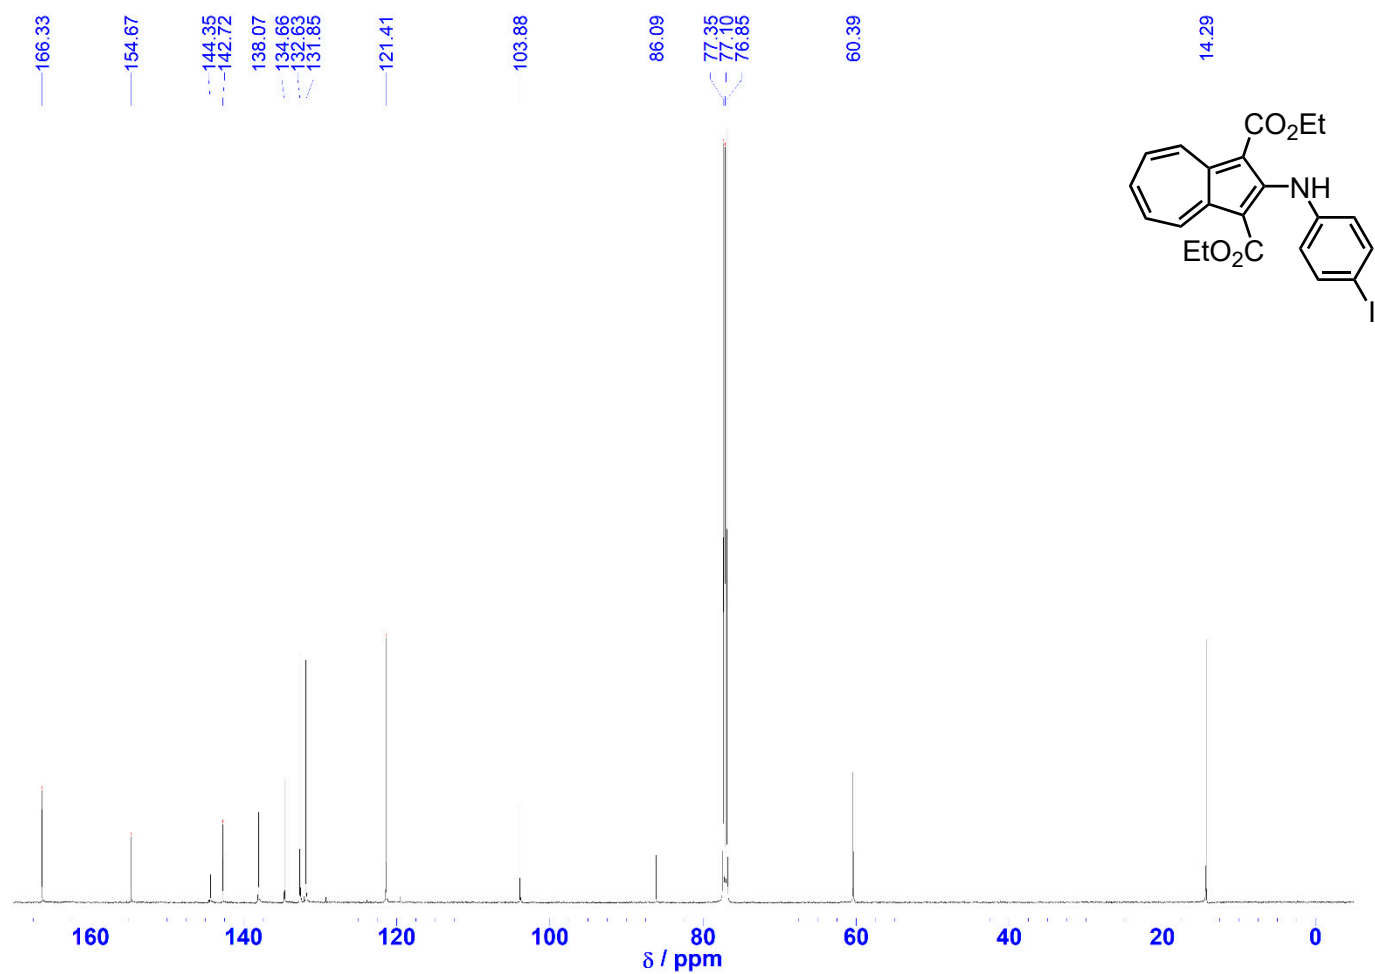

Figure S12.  $^{13}\text{C}$  NMR spectrum of **2f** in  $\text{CDCl}_3$  (125 MHz).

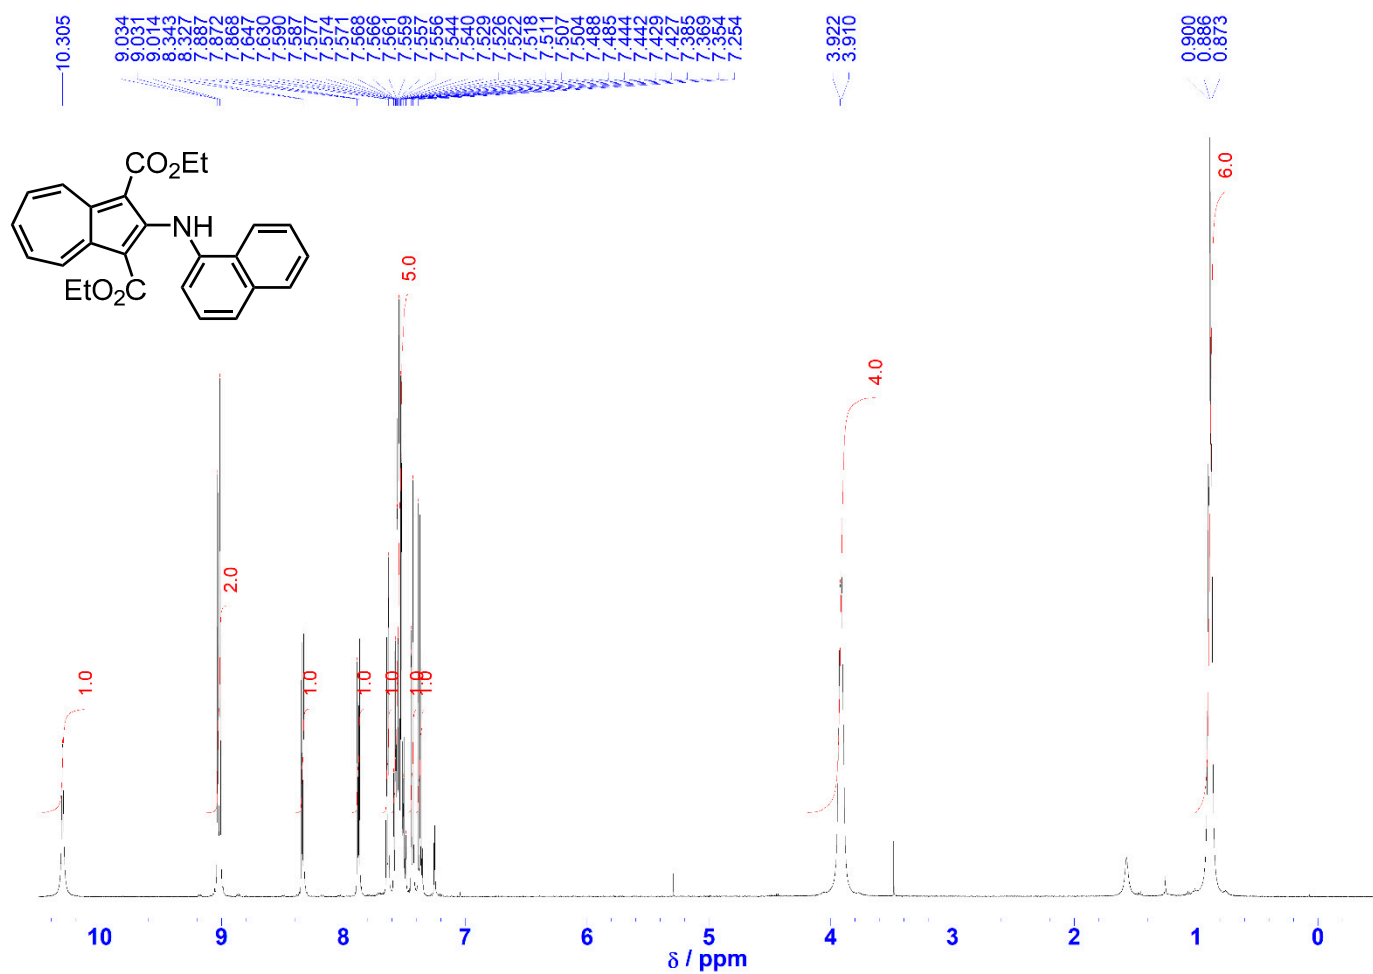

**Figure S13.**  $^1\text{H}$  NMR spectrum of **2f** in  $\text{CDCl}_3$  (500 MHz).

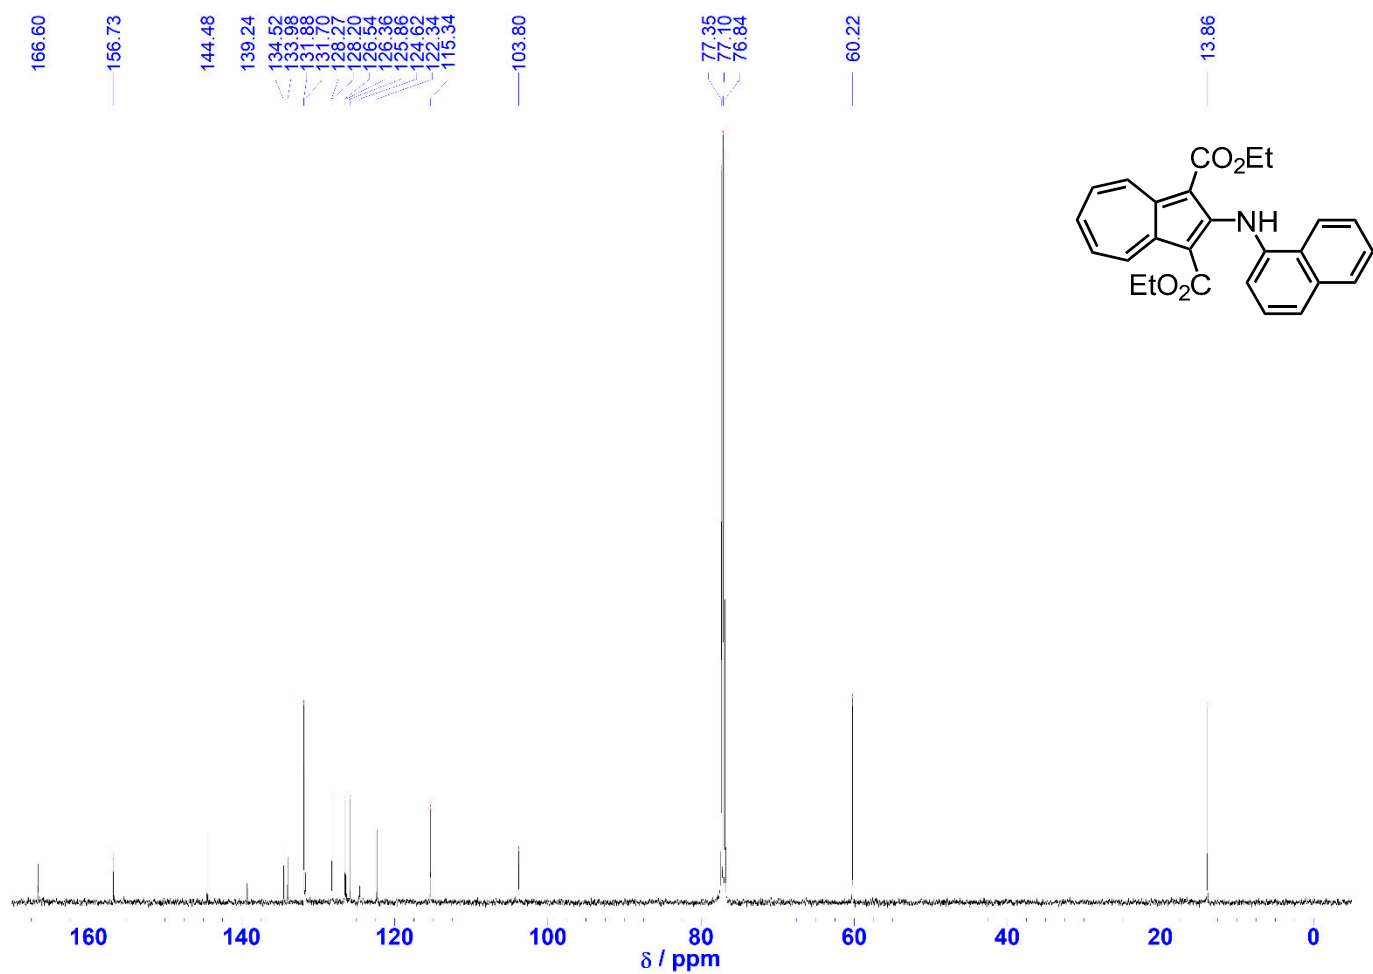

Figure S14.  $^{13}\text{C}$  NMR spectrum of **2f** in  $\text{CDCl}_3$  (125 MHz).

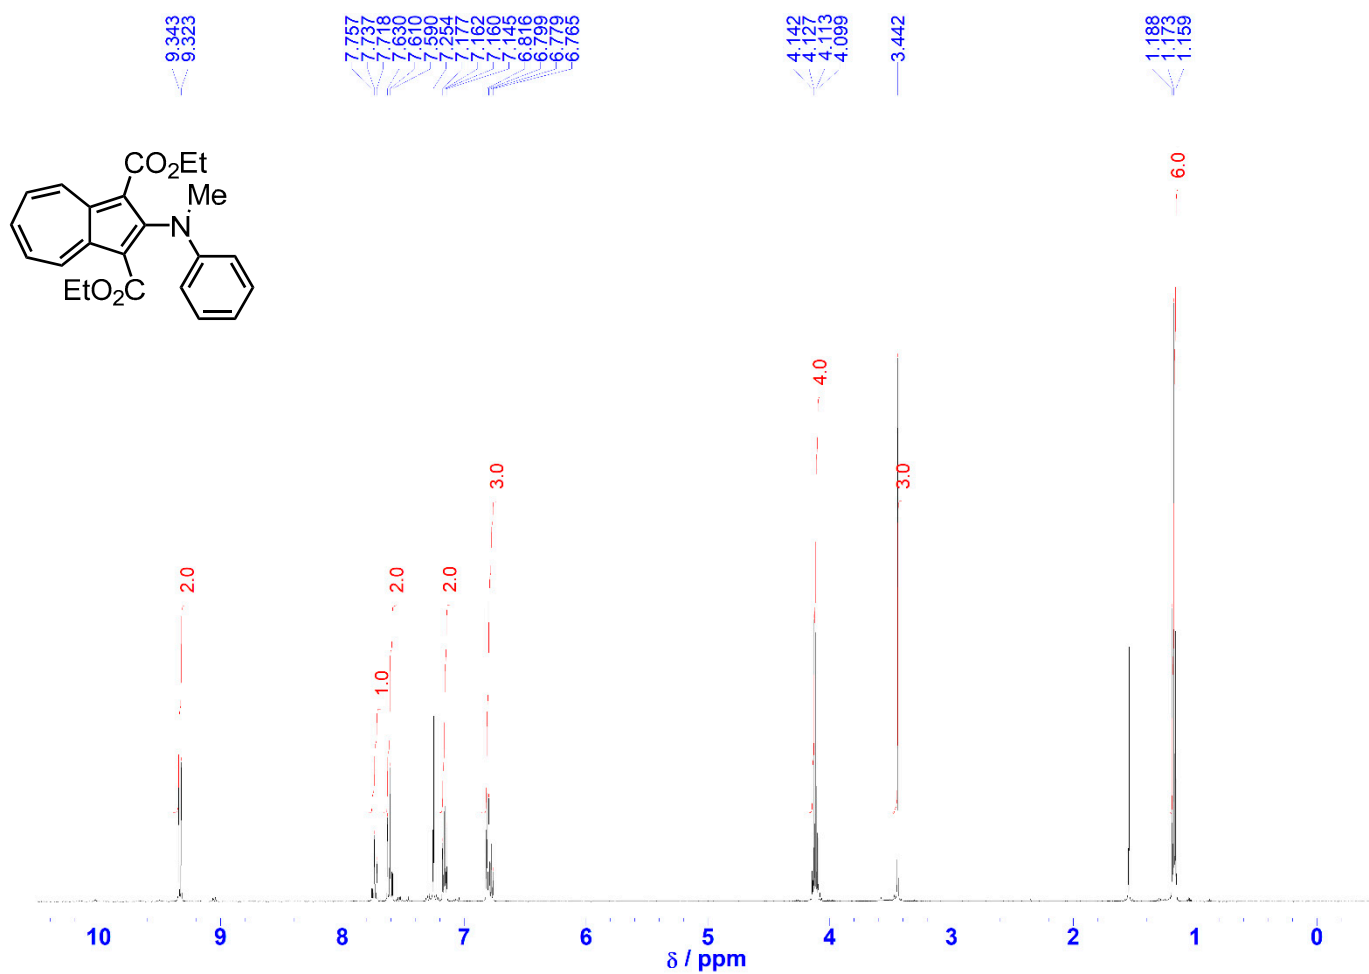

Figure S15. <sup>1</sup>H NMR spectrum of **2g** in CDCl<sub>3</sub> (500 MHz).

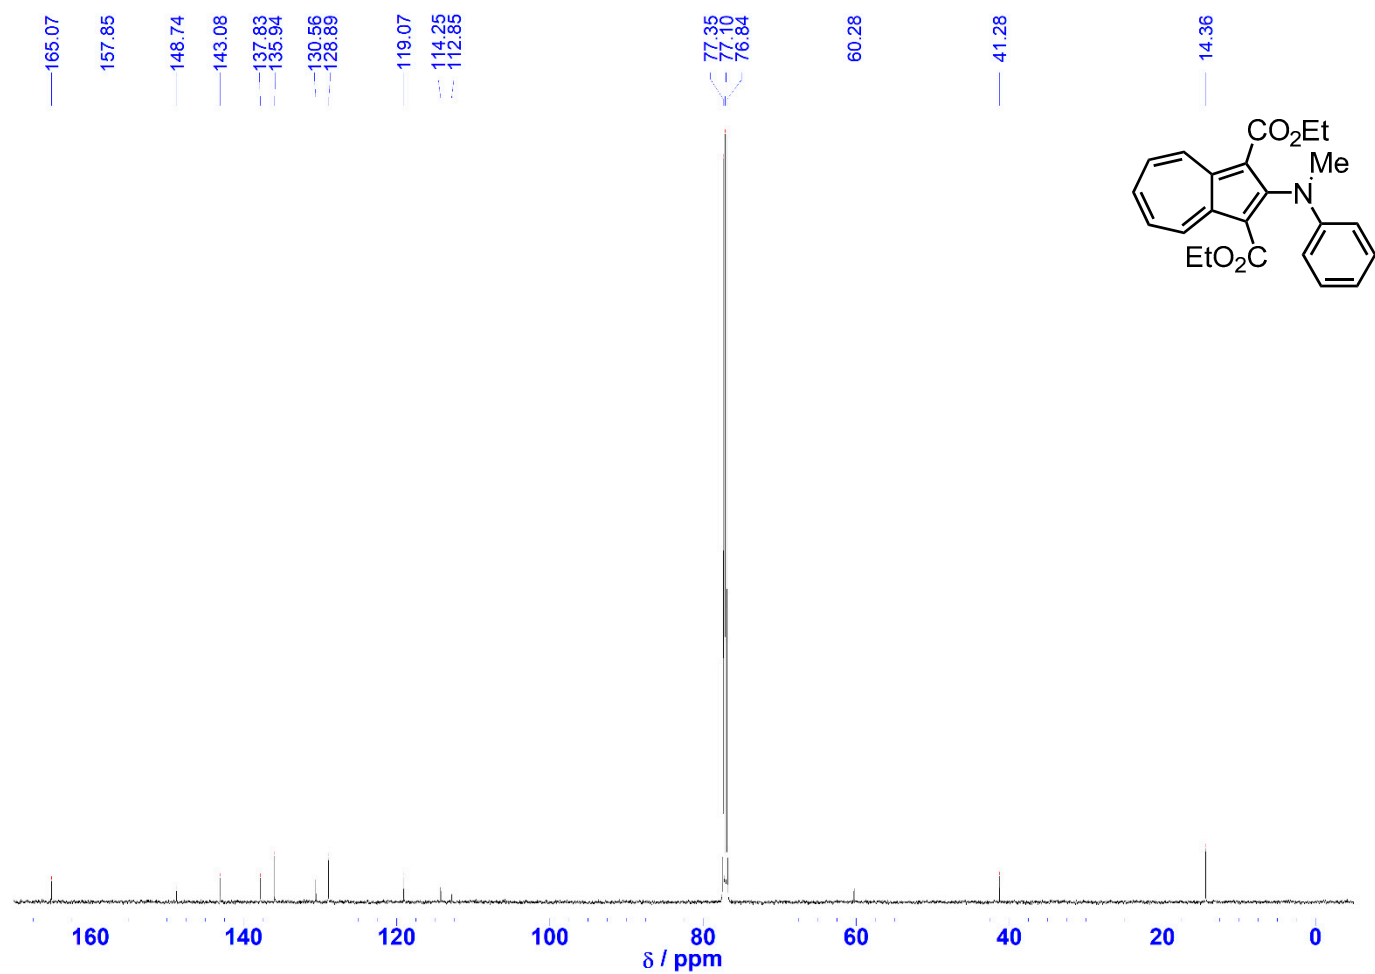

Figure S16.  $^{13}\text{C}$  NMR spectrum of **2g** in  $\text{CDCl}_3$  (125 MHz).

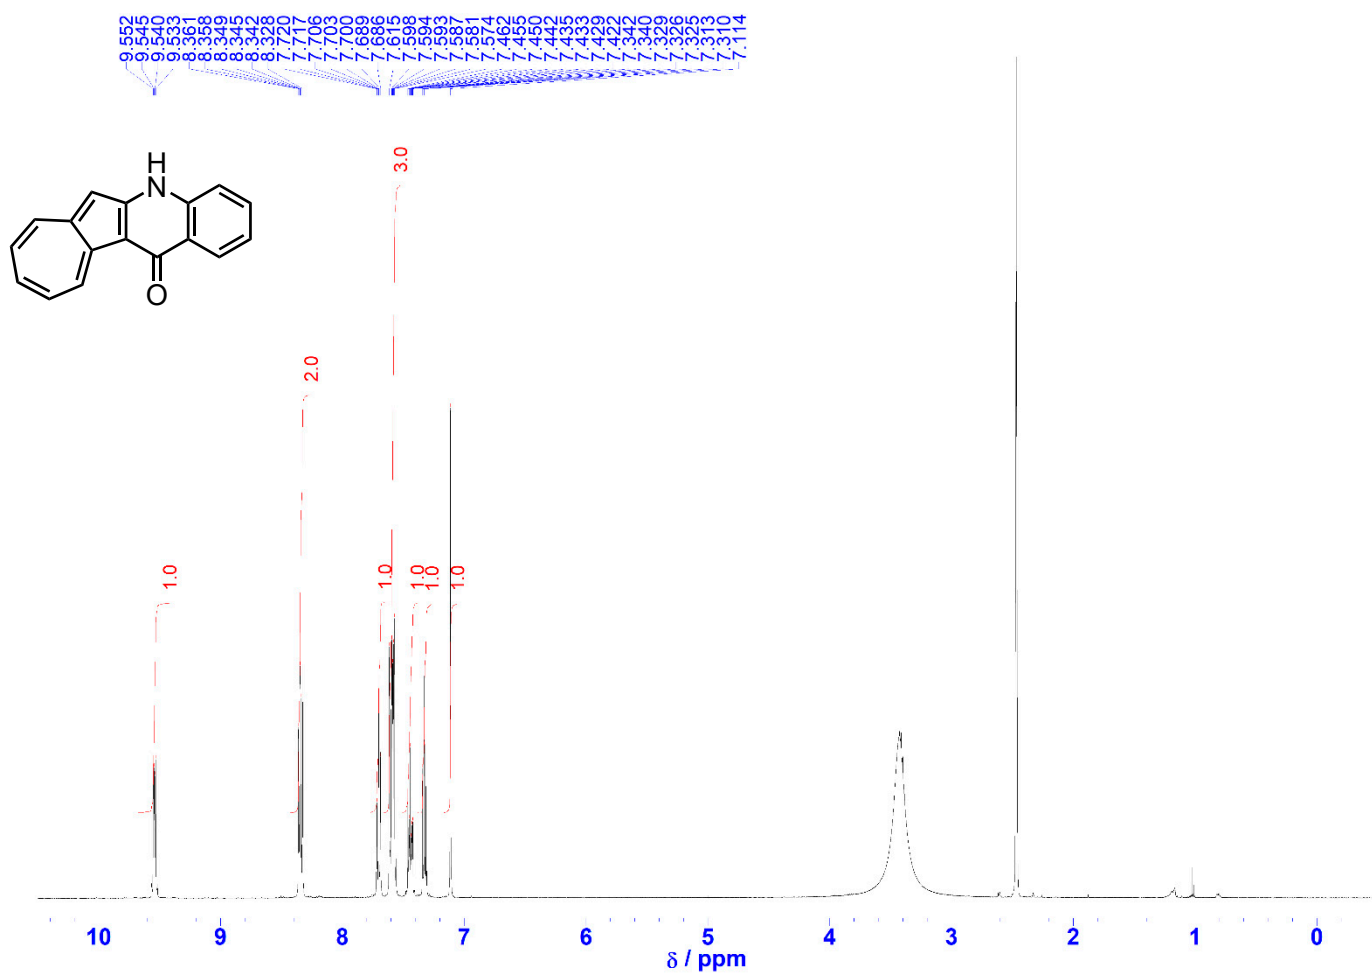

**Figure S17.**  $^1\text{H}$  NMR spectrum of **3a** in  $\text{DMSO-}d_6$  (500 MHz).

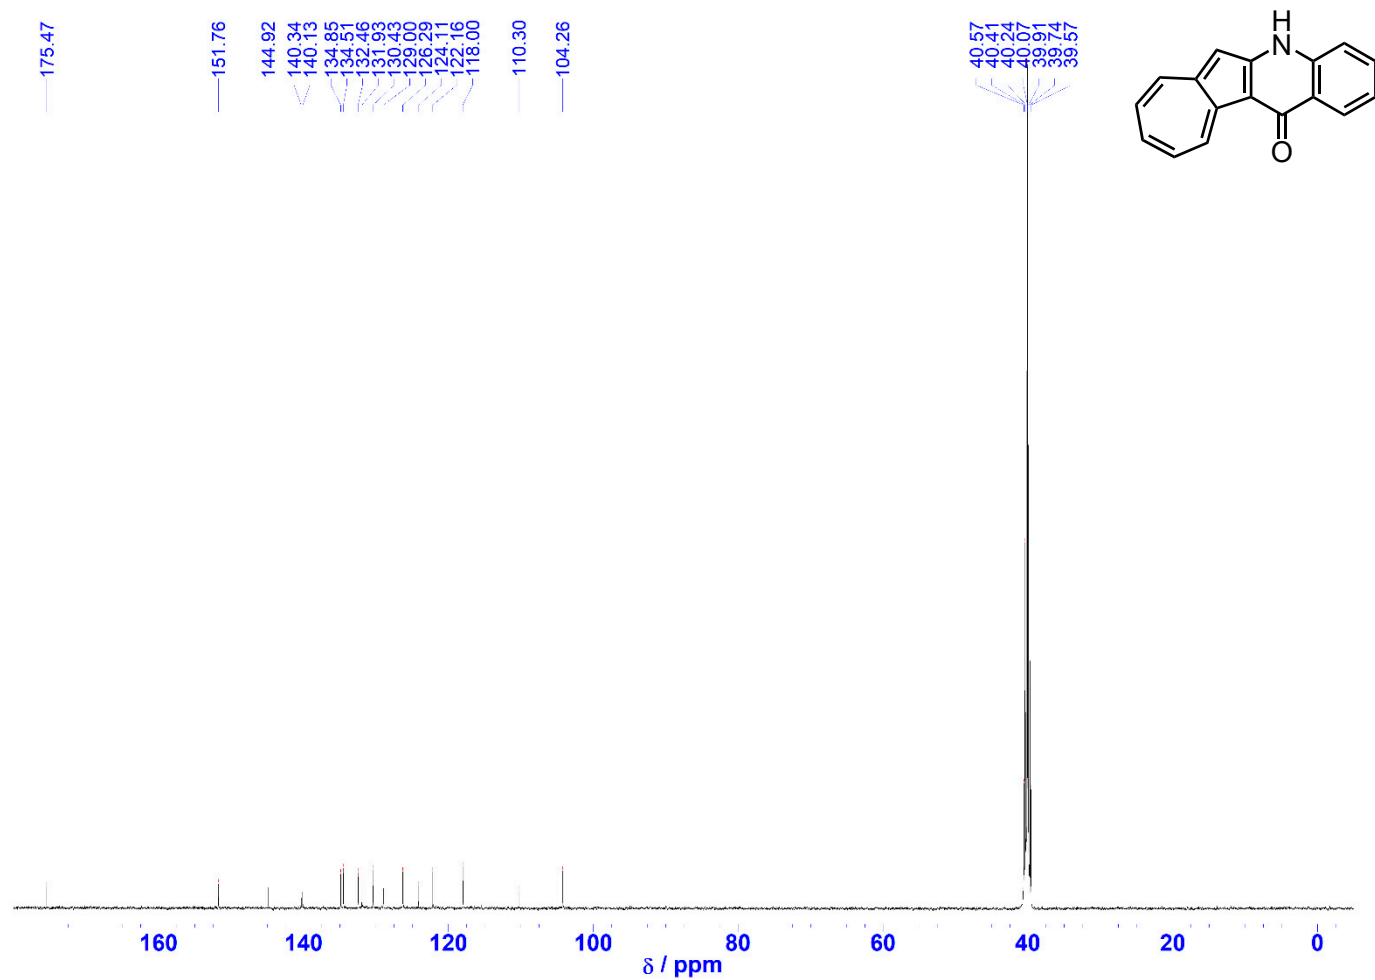

**Figure S18.**  $^{13}\text{C}$  NMR spectrum of **3a** in  $\text{DMSO}-d_6$  (125 MHz).

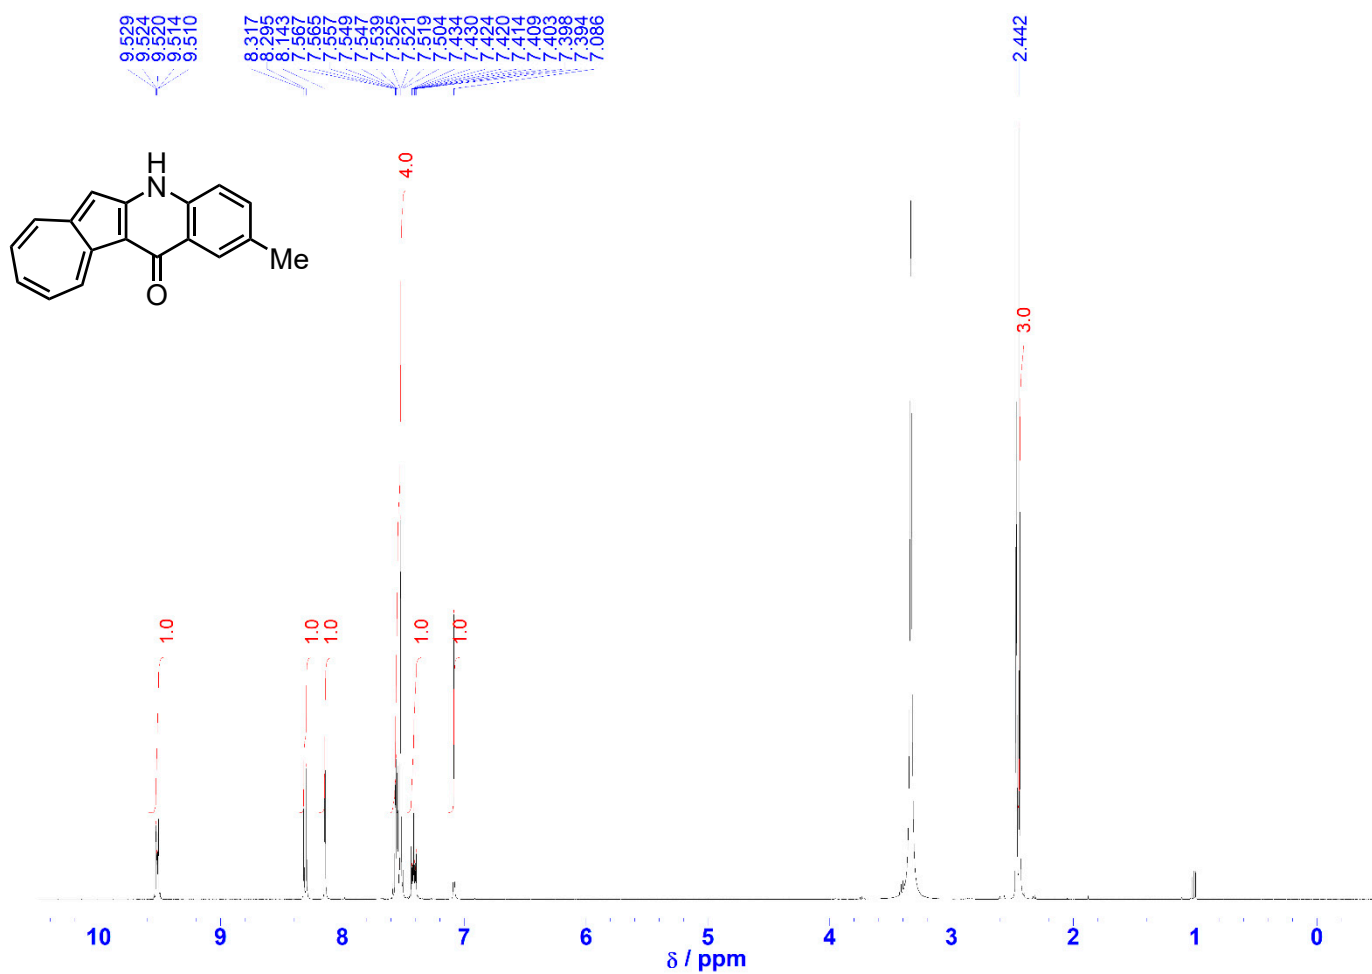

**Figure S19.**  $^1\text{H}$  NMR spectrum of **3b** in  $\text{DMSO}-d_6$  (500 MHz).

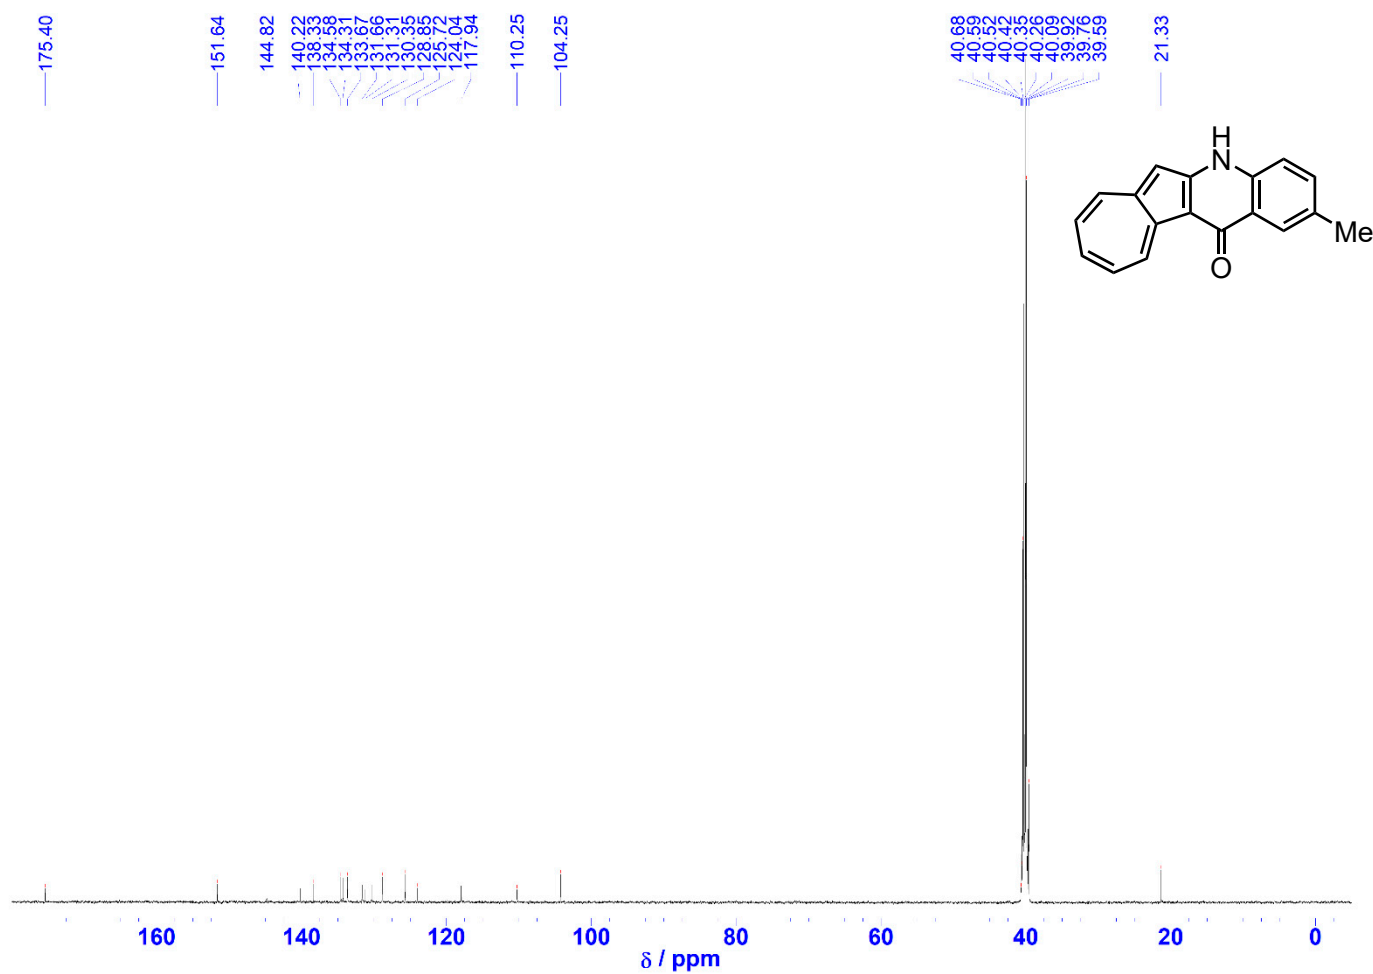

Figure S20.  $^{13}\text{C}$  NMR spectrum of **3b** in  $\text{DMSO-}d_6$  (125 MHz).

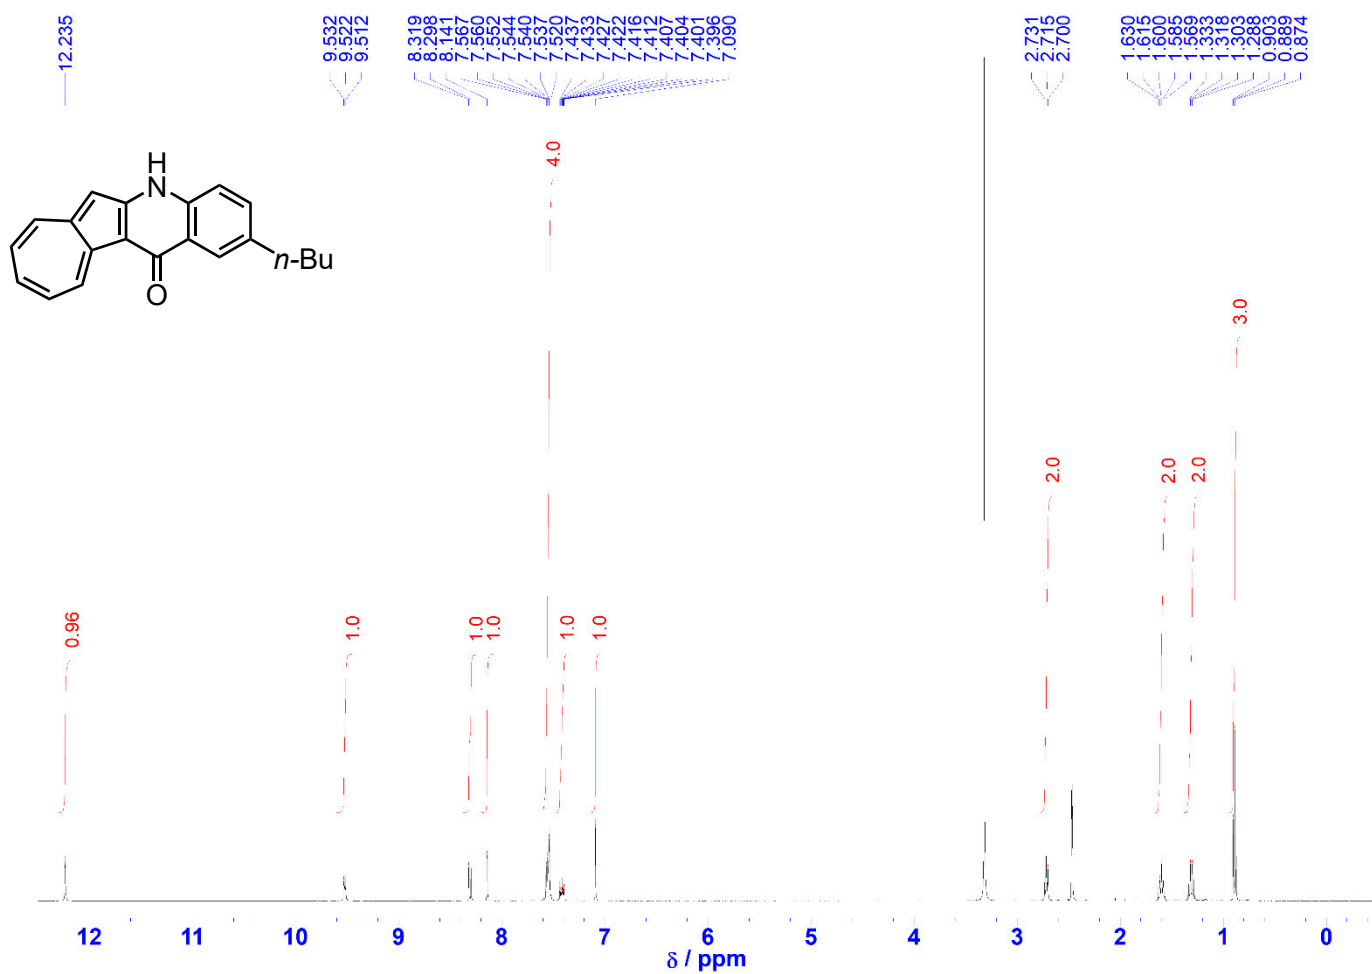

**Figure S21.** <sup>1</sup>H NMR spectrum of **3c** in DMSO-*d*<sub>6</sub> (500 MHz).

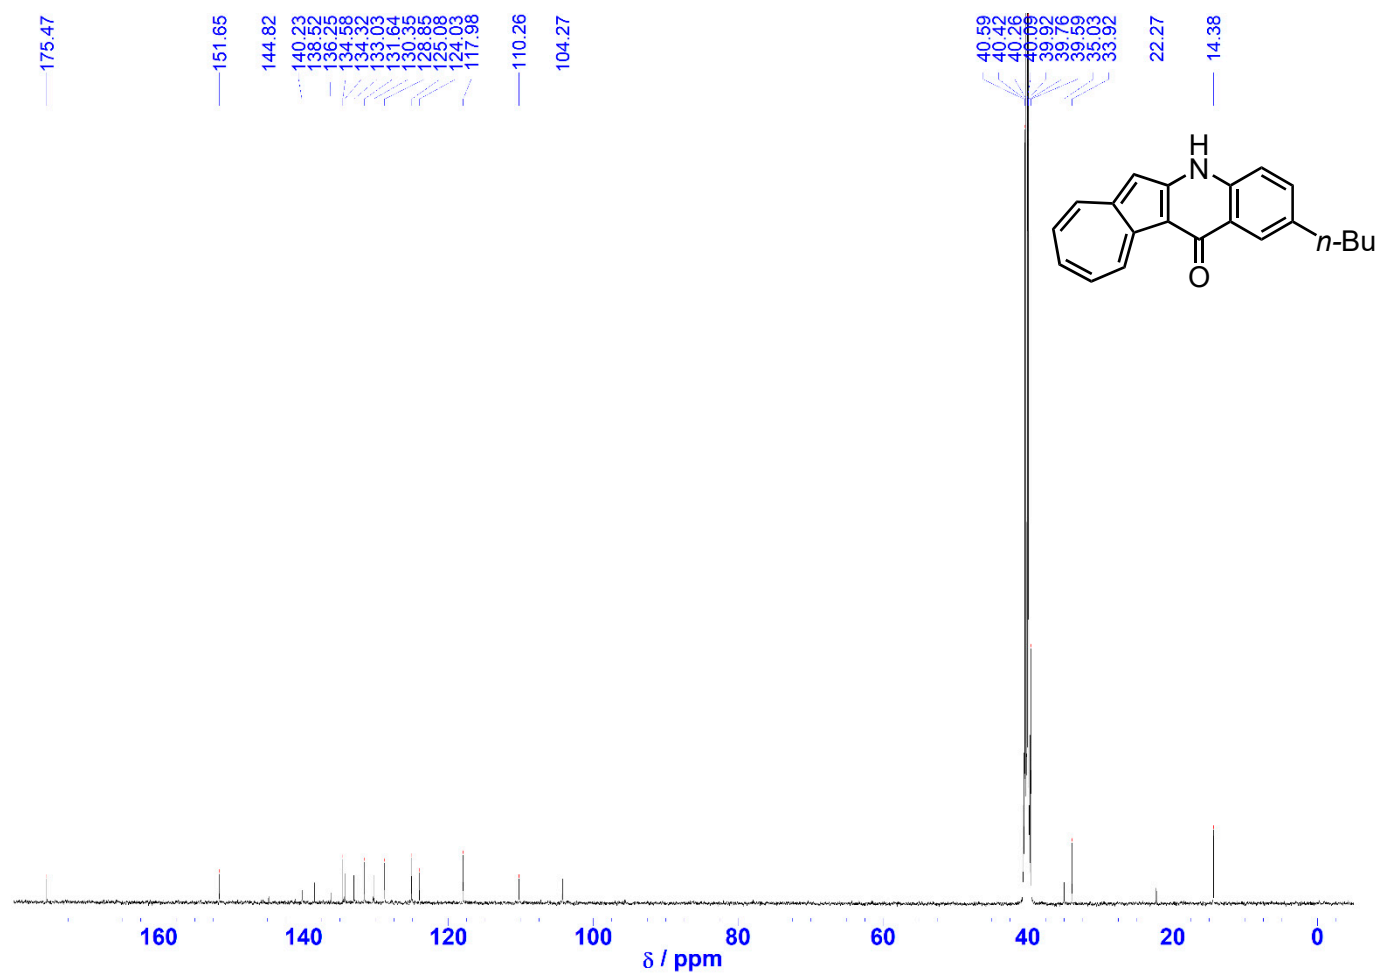

**Figure S22.**  $^{13}\text{C}$  NMR spectrum of **3c** in  $\text{DMSO-}d_6$  (125 MHz).

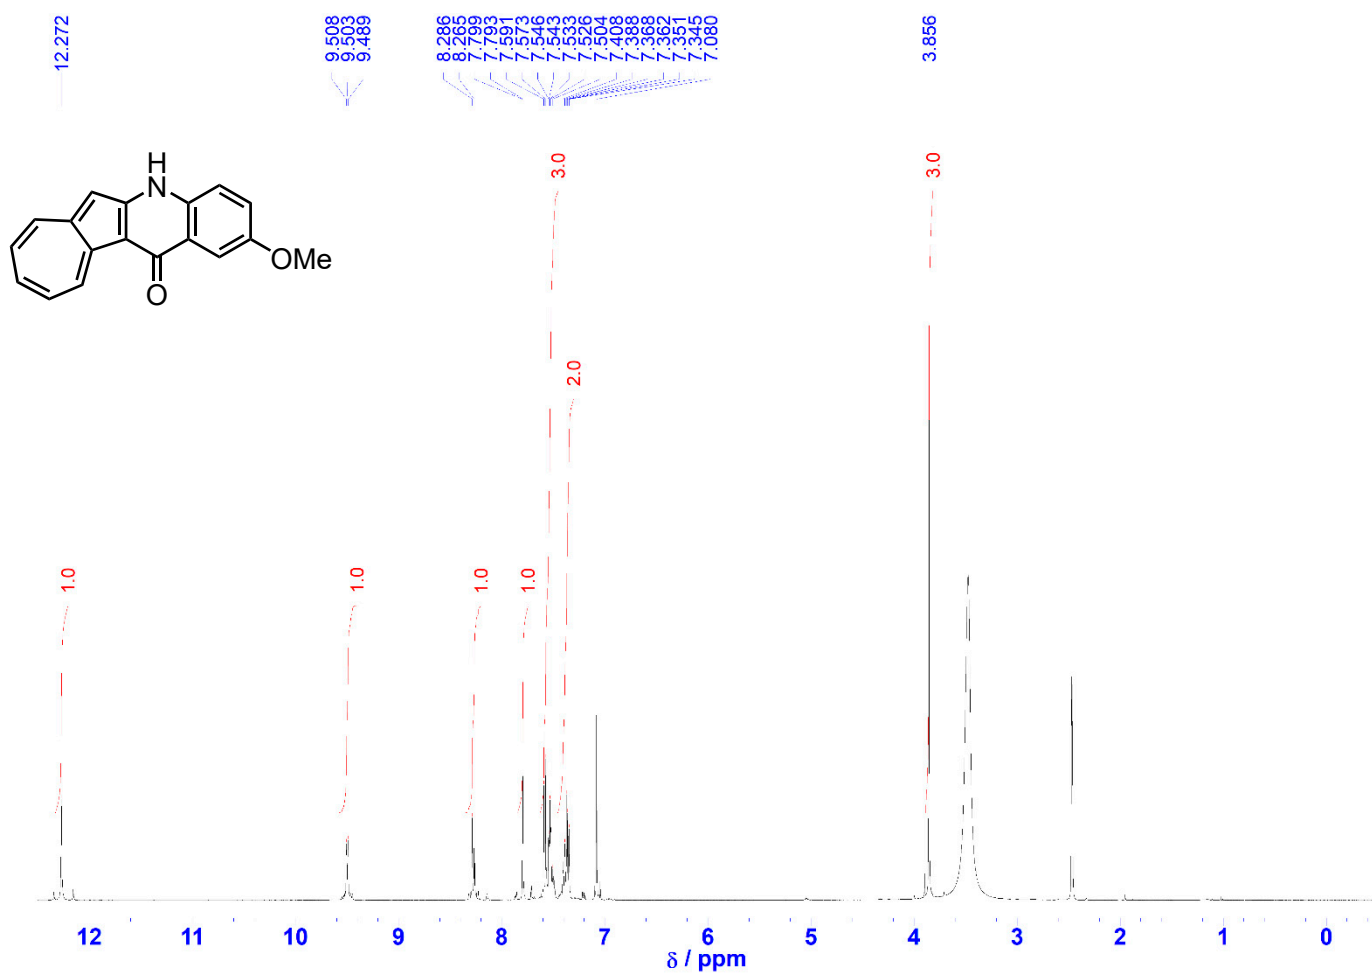

**Figure S23.**  $^1\text{H}$  NMR spectrum of **3d** in  $\text{DMSO}-d_6$  (500 MHz).

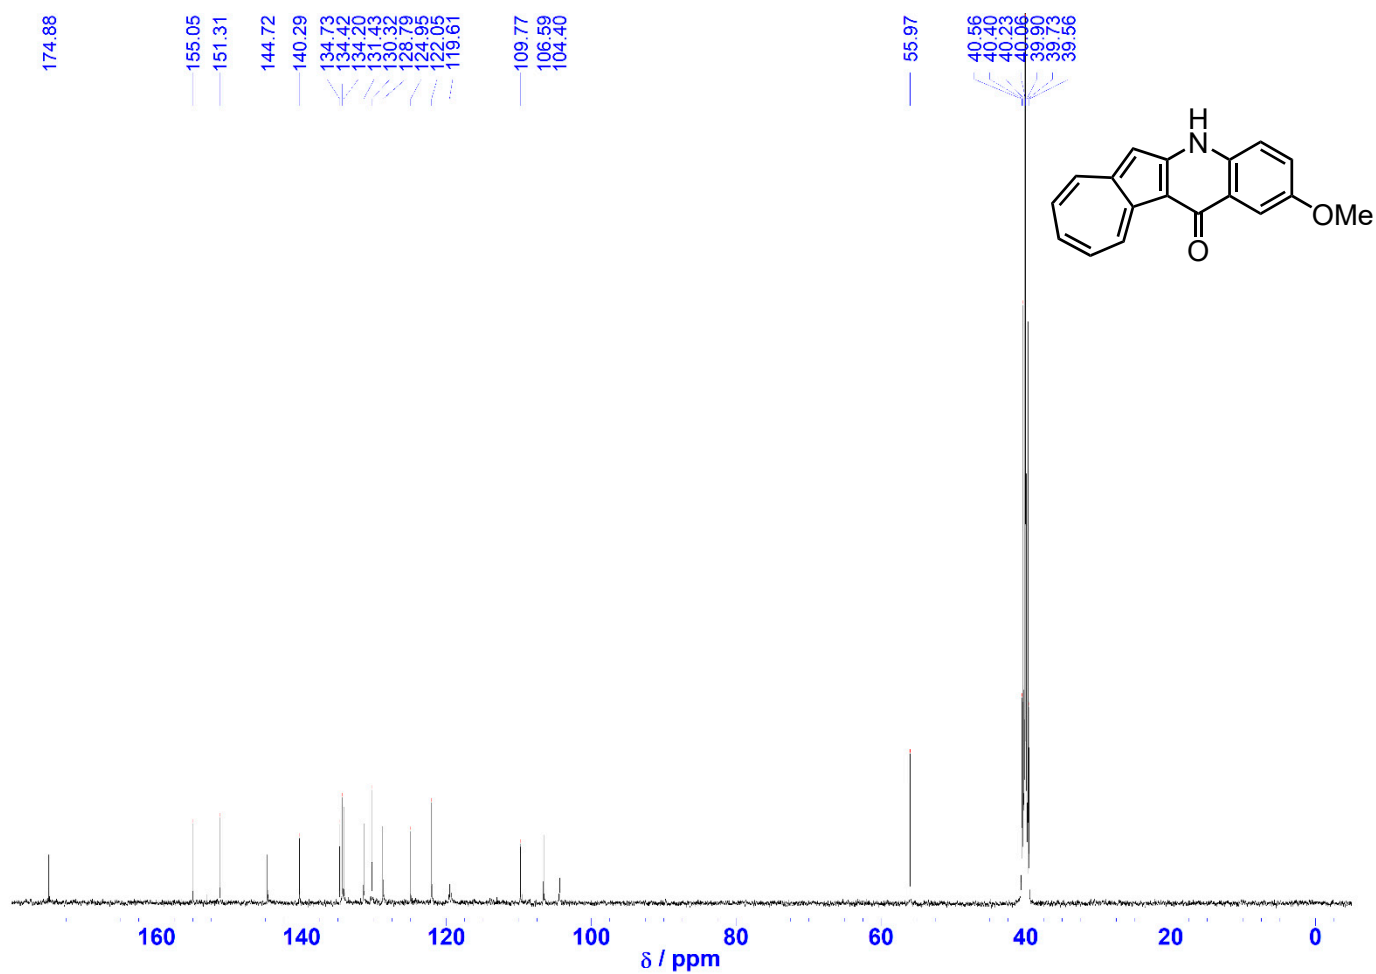

**Figure S24.**  $^{13}\text{C}$  NMR spectrum of **3d** in  $\text{DMSO}-d_6$  (125 MHz).

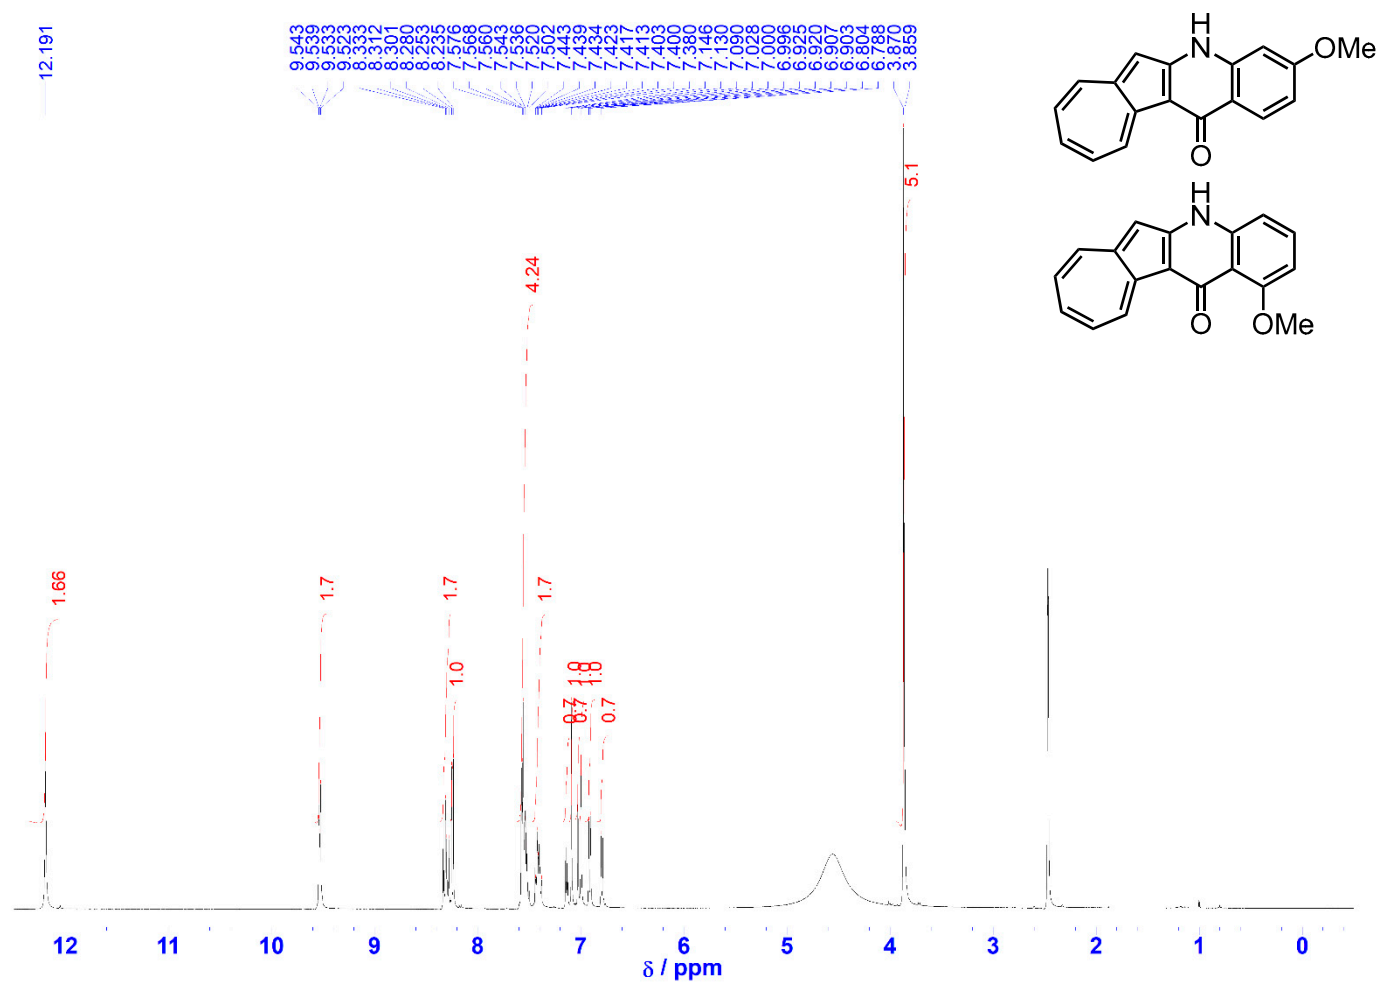

**Figure S25.**  $^1\text{H}$  NMR spectrum of **3e** and **3e'** in  $\text{DMSO-}d_6$  (500 MHz).

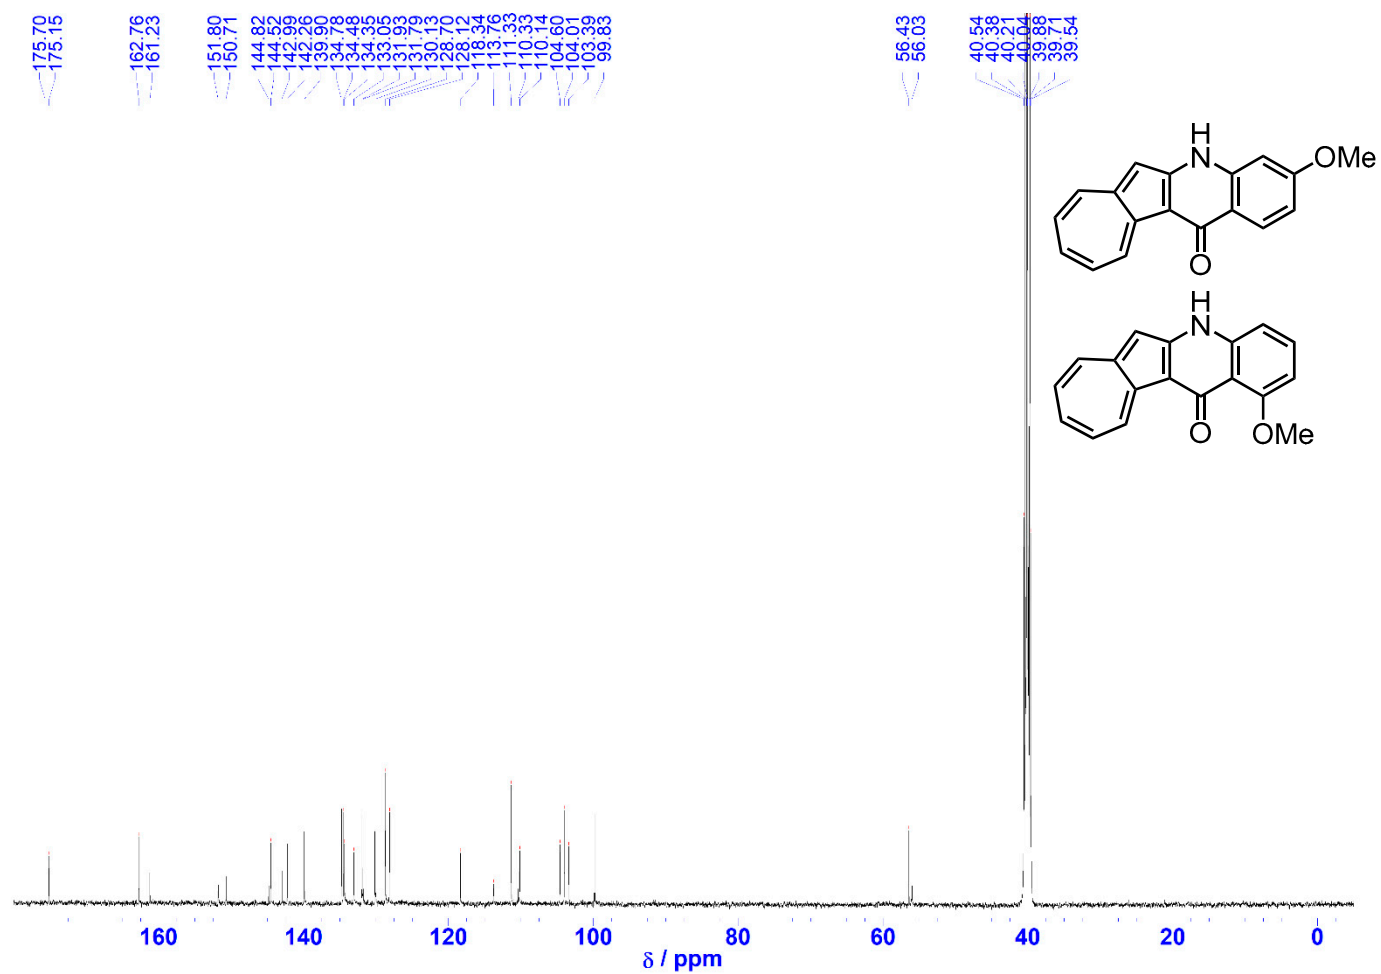

Figure S26. <sup>13</sup>C NMR spectrum of **3e** and **3e'** in DMSO-*d*<sub>6</sub> (125 MHz).

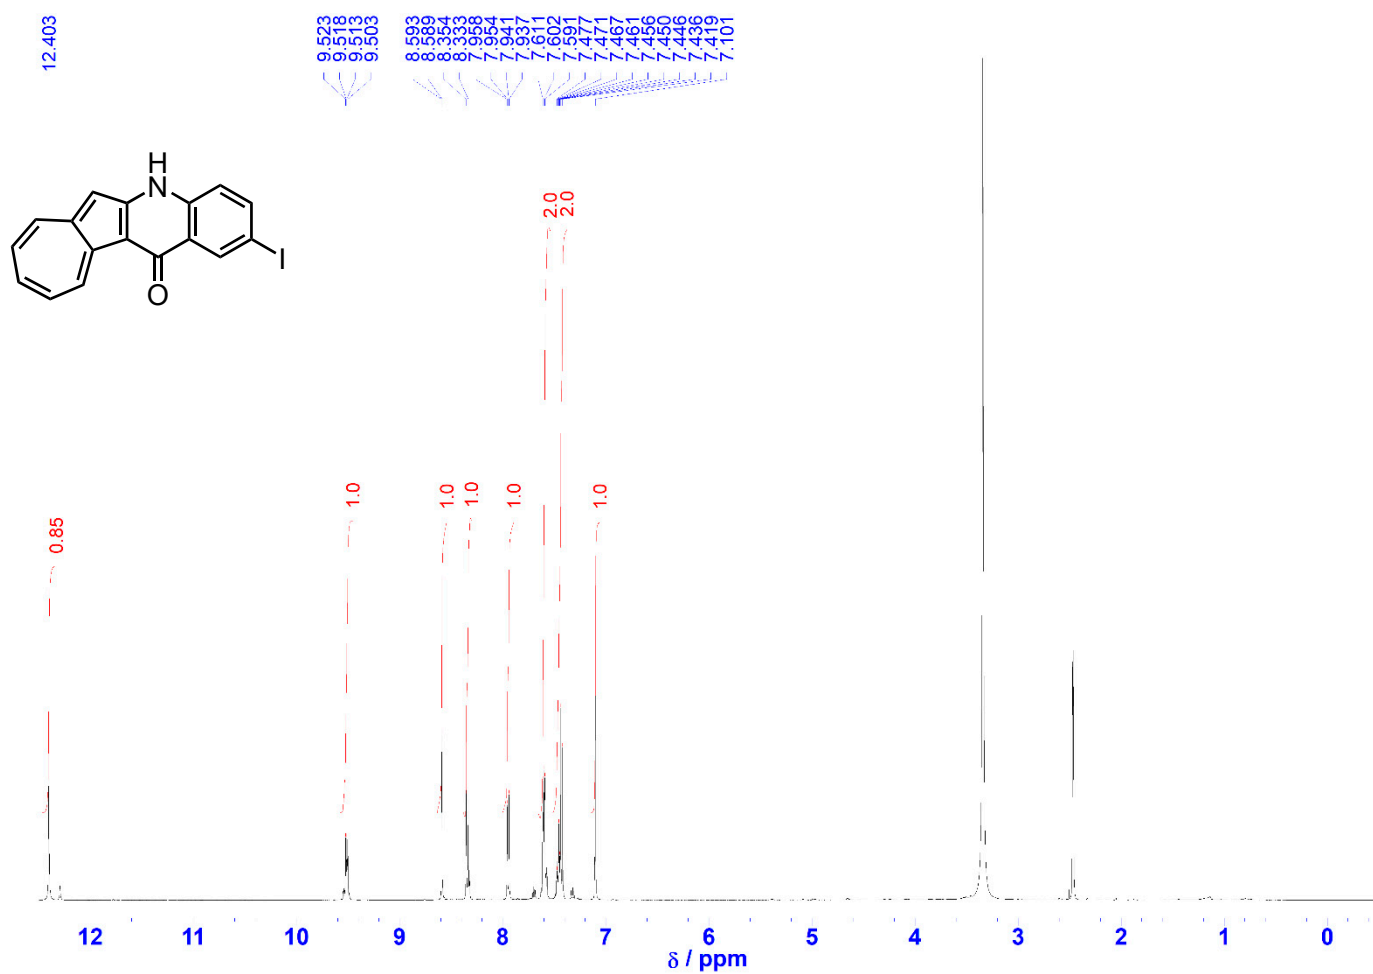

Figure S27. <sup>1</sup>H NMR spectrum of 3f in DMSO-*d*<sub>6</sub> (500 MHz).

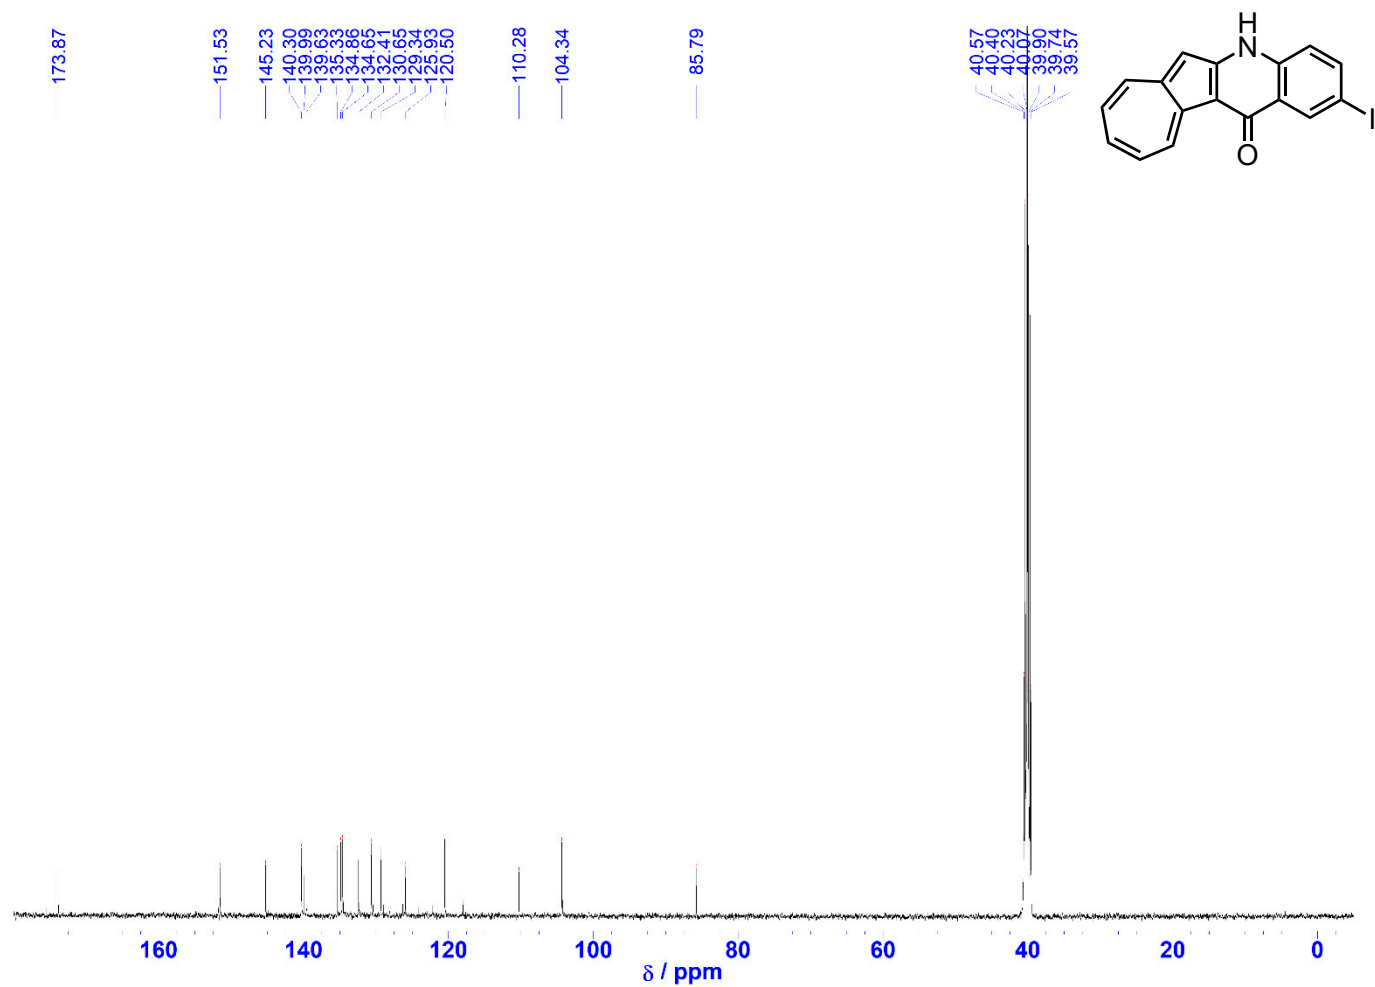

Figure S28.  $^{13}\text{C}$  NMR spectrum of **3f** in  $\text{DMSO}-d_6$  (125 MHz).

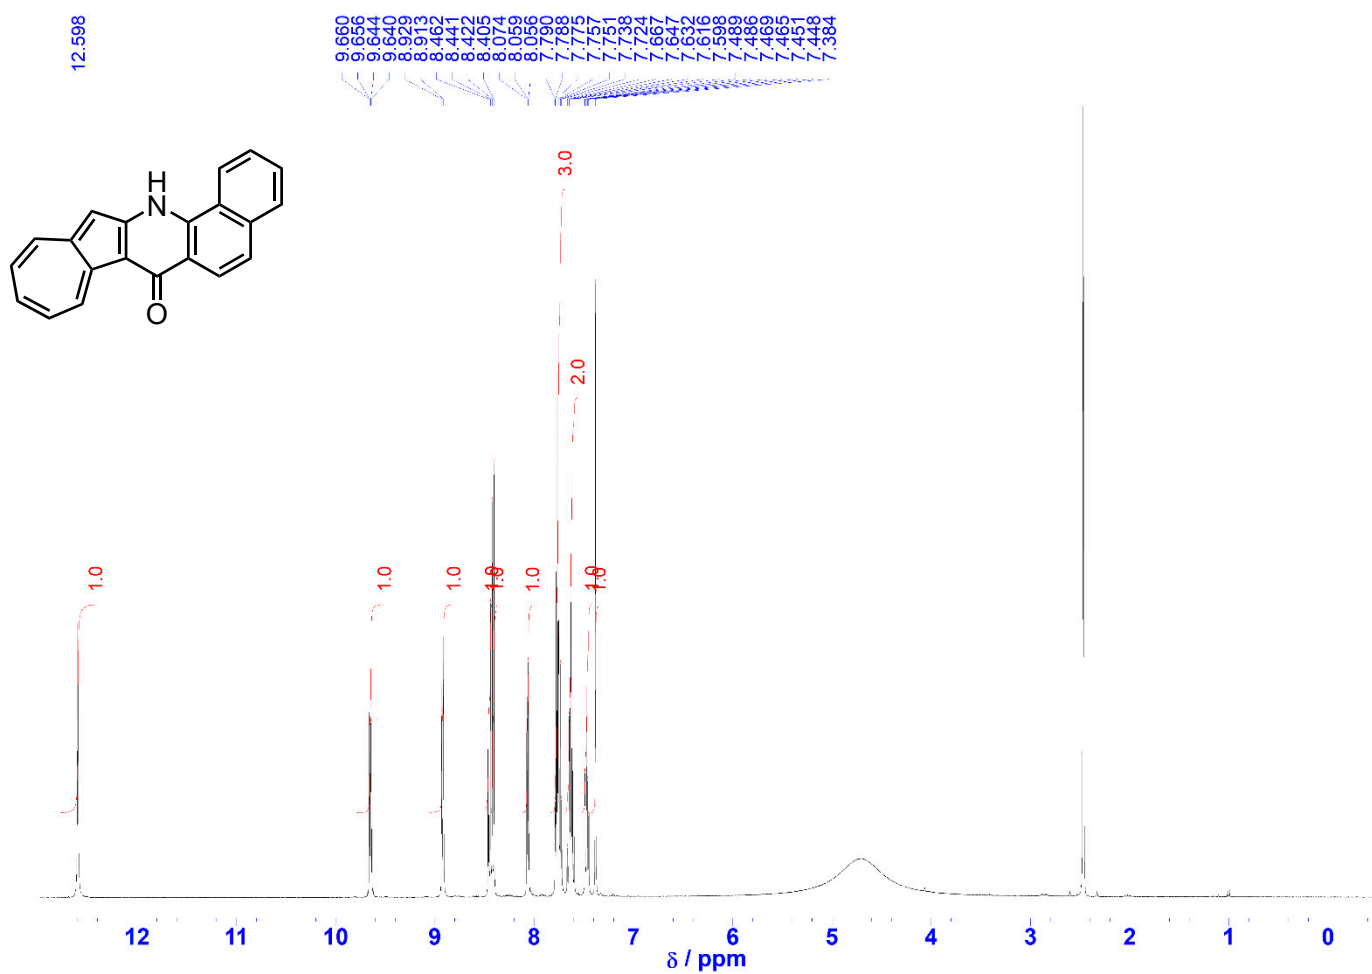

**Figure S29.**  $^1\text{H}$  NMR spectrum of **3g** in  $\text{DMSO}-d_6$  (500 MHz).

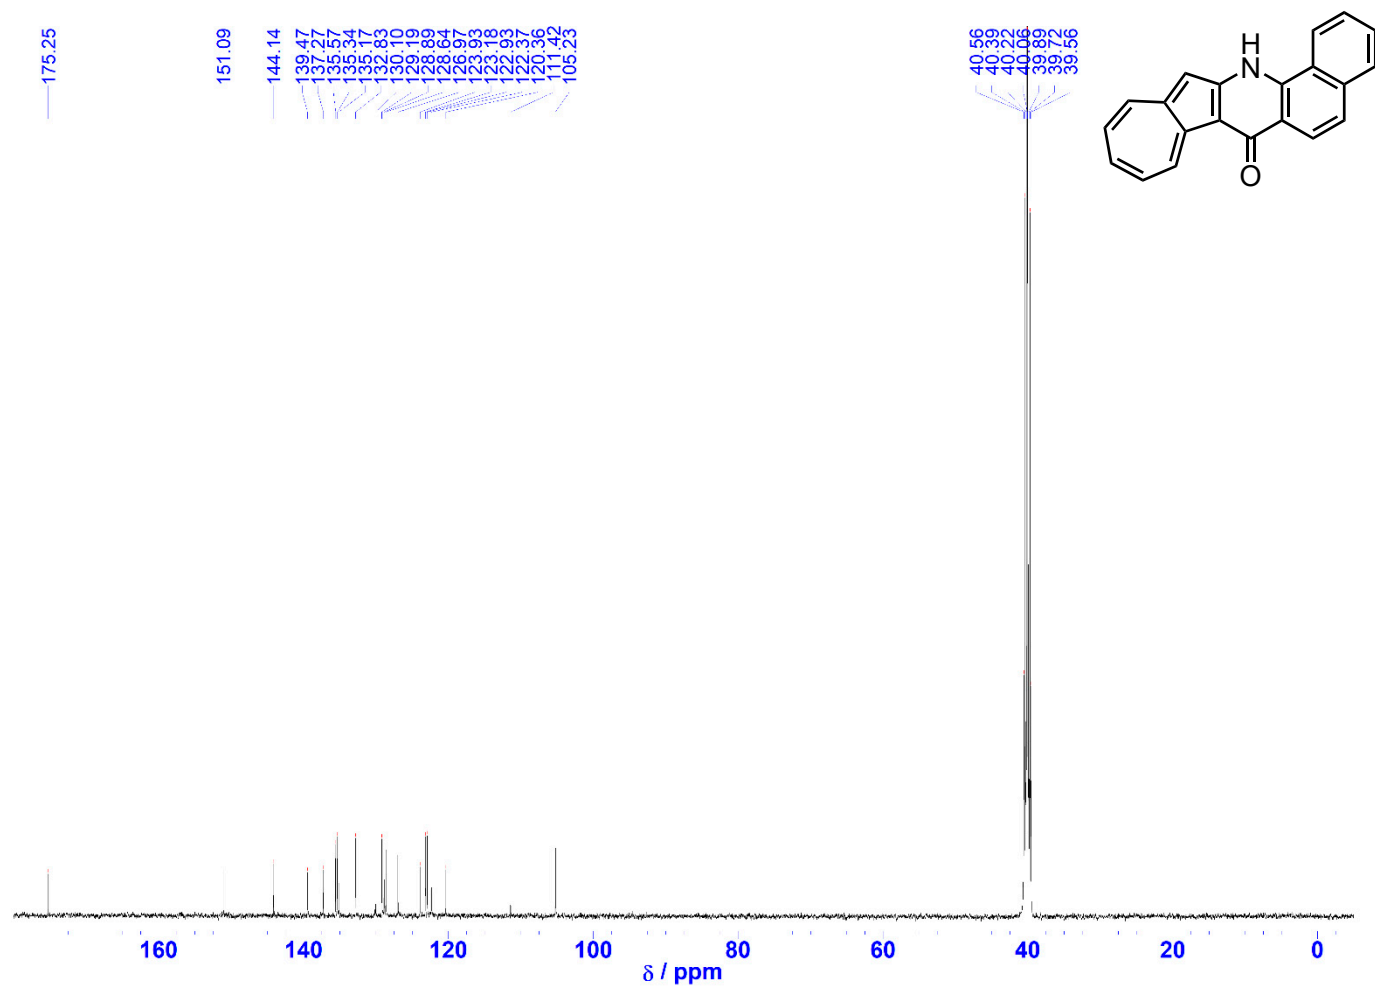

Figure S30.  $^{13}\text{C}$  NMR spectrum of **3g** in  $\text{DMSO}-d_6$  (125 MHz).

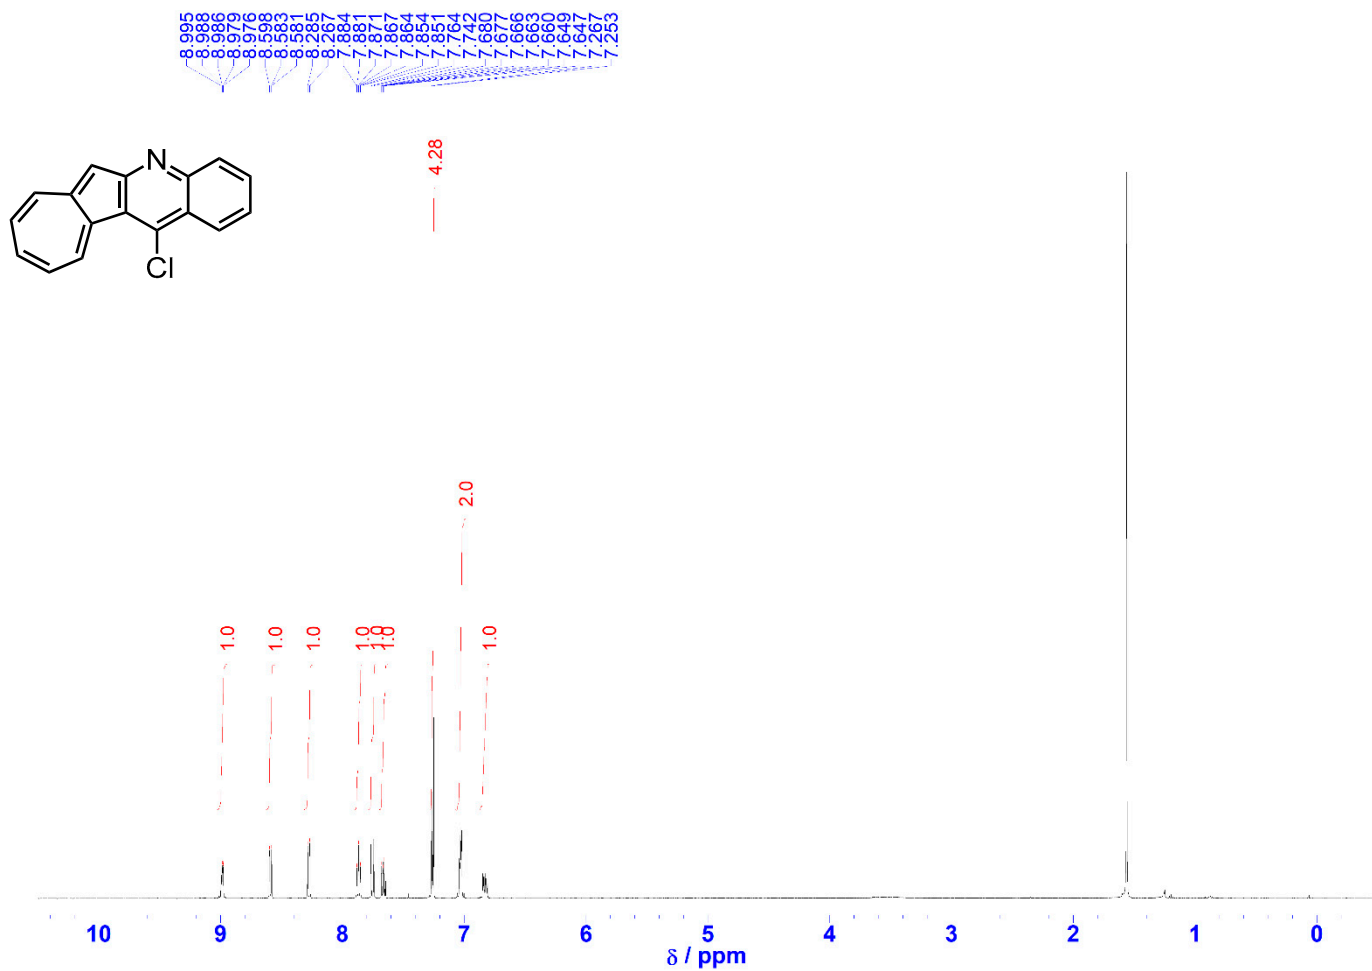

Figure S31. <sup>1</sup>H NMR spectrum of **4a** in CDCl<sub>3</sub> (500 MHz).

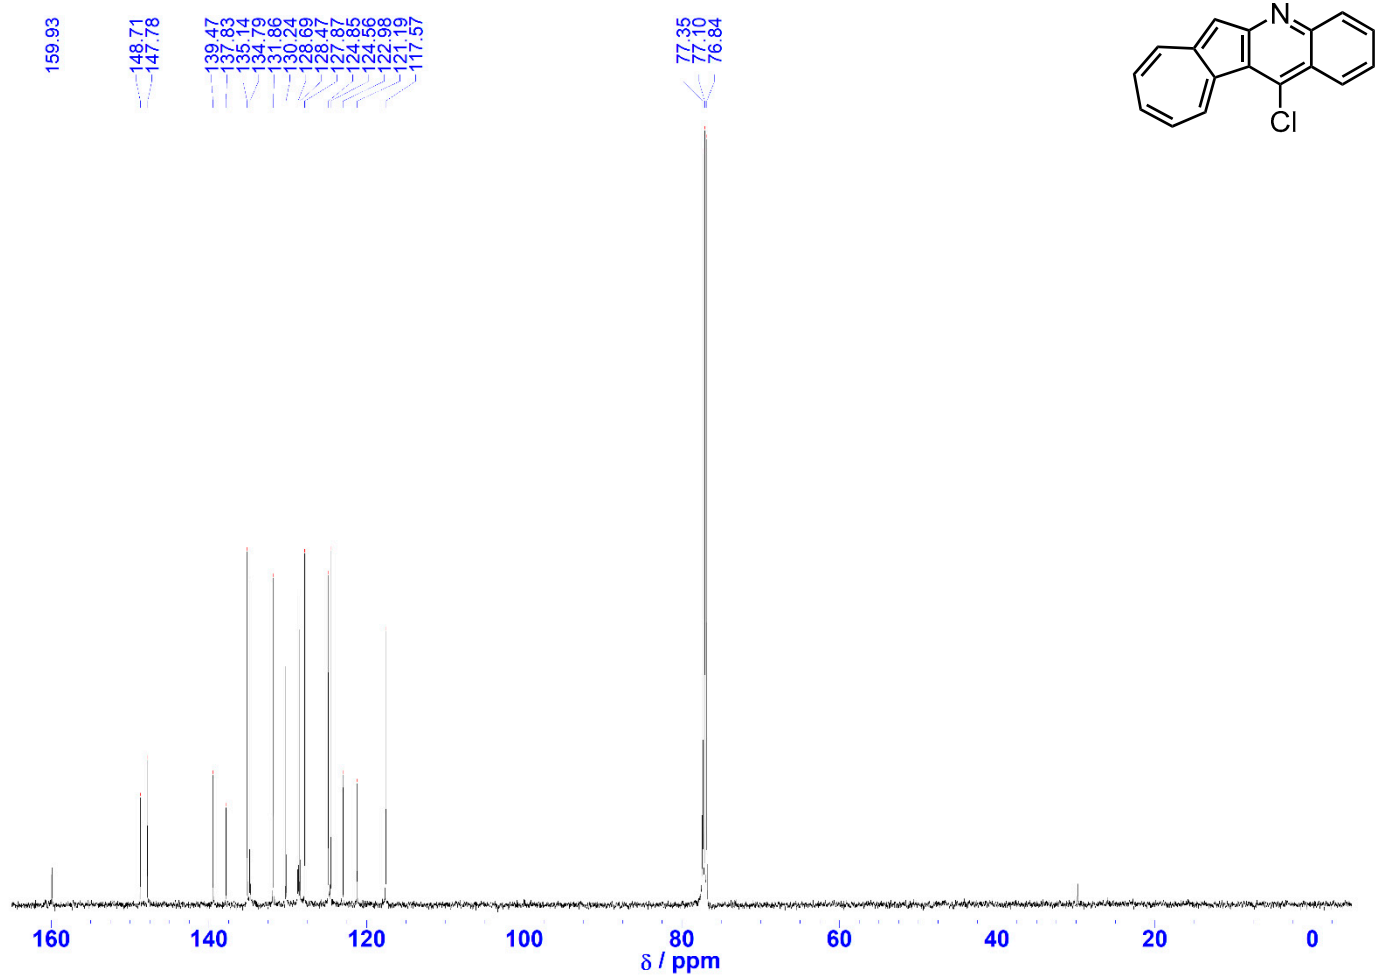

Figure S32.  $^{13}\text{C}$  NMR spectrum of **4a** in  $\text{CDCl}_3$  (125 MHz).

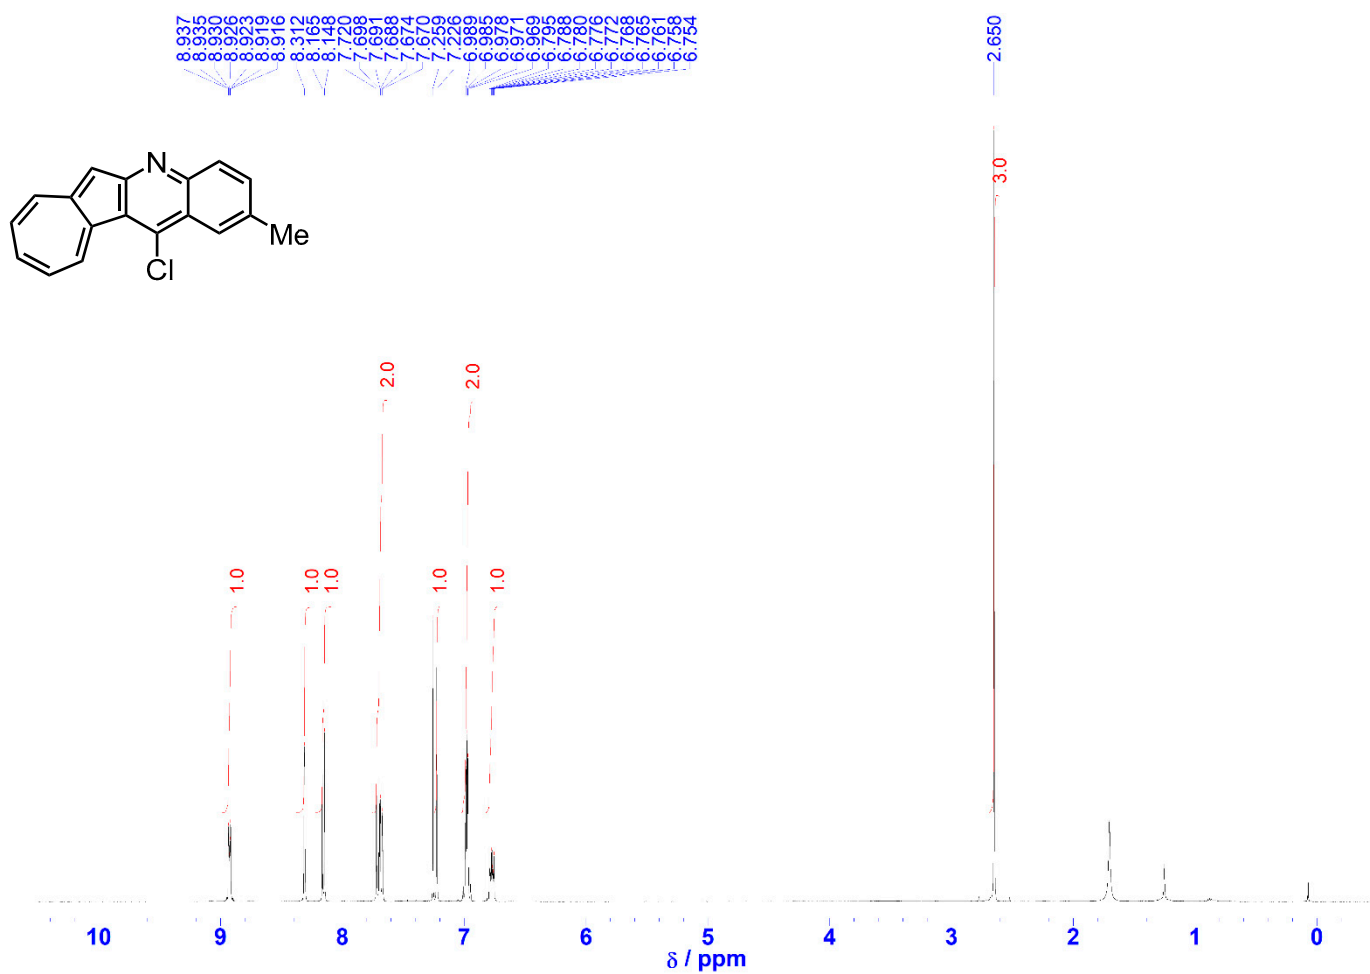

**Figure S33.**  $^1\text{H}$  NMR spectrum of **4b** in  $\text{CDCl}_3$  (500 MHz).

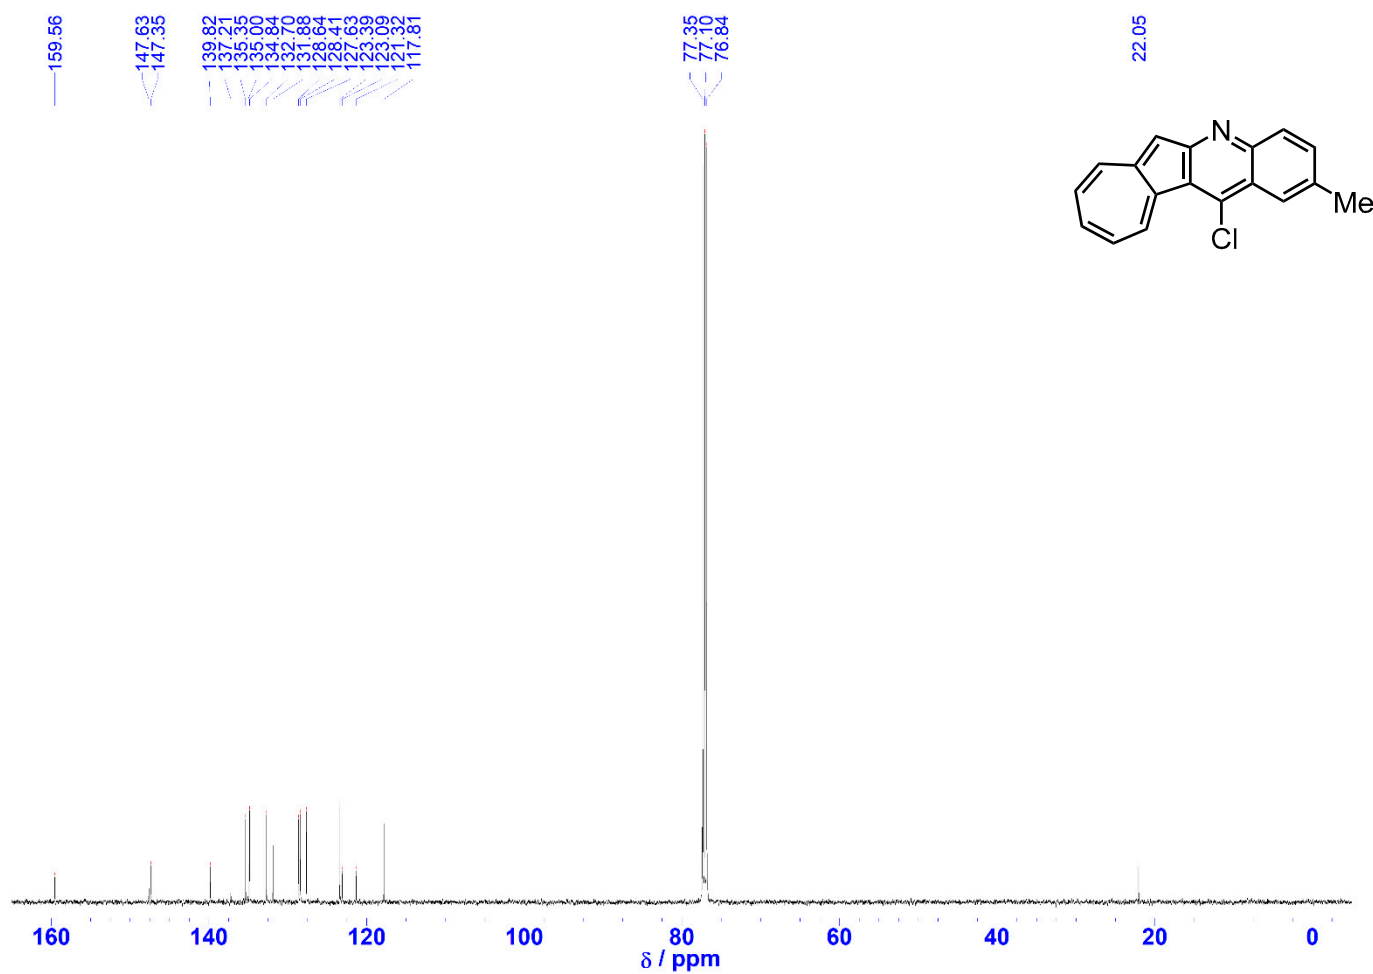

Figure S34. <sup>13</sup>C NMR spectrum of **4b** in CDCl<sub>3</sub> (125 MHz).

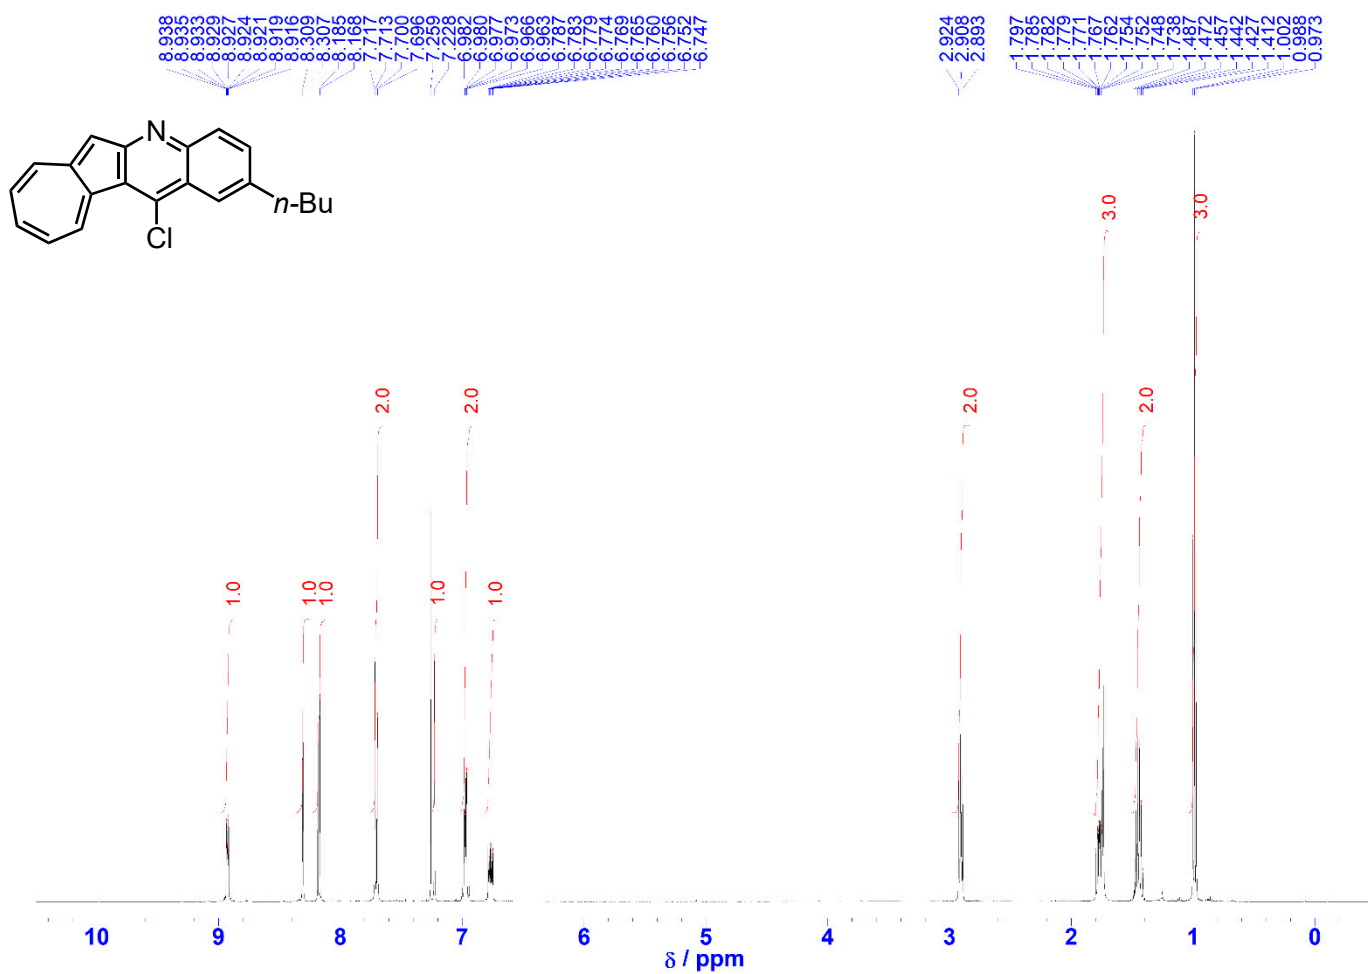

**Figure S35.**  $^1\text{H}$  NMR spectrum of **4c** in  $\text{CDCl}_3$  (500 MHz).

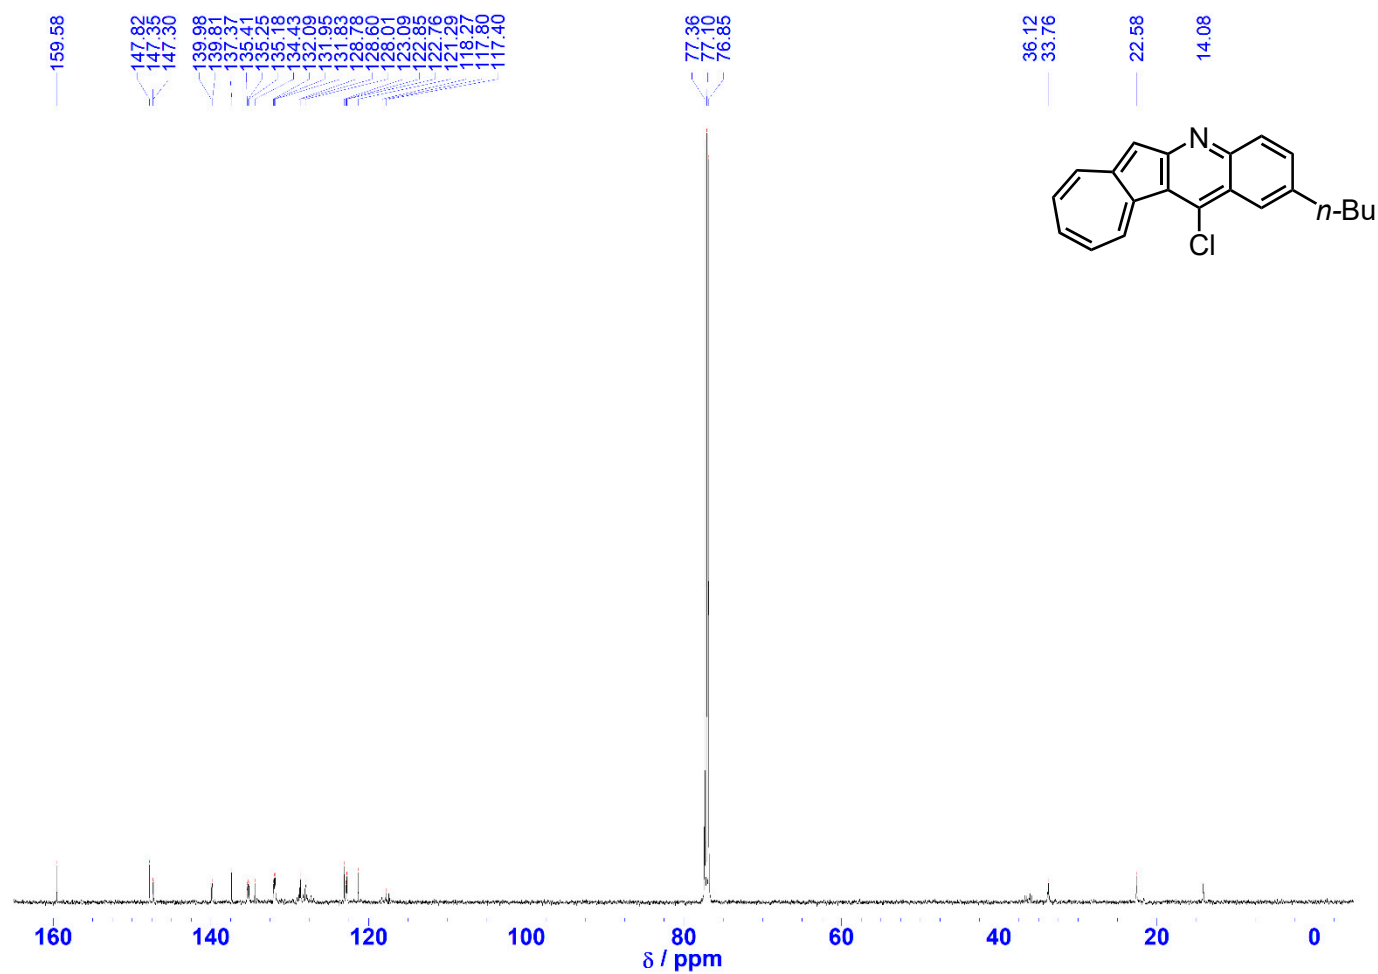

Figure S36. <sup>13</sup>C NMR spectrum of **4c** in CDCl<sub>3</sub> (125 MHz).

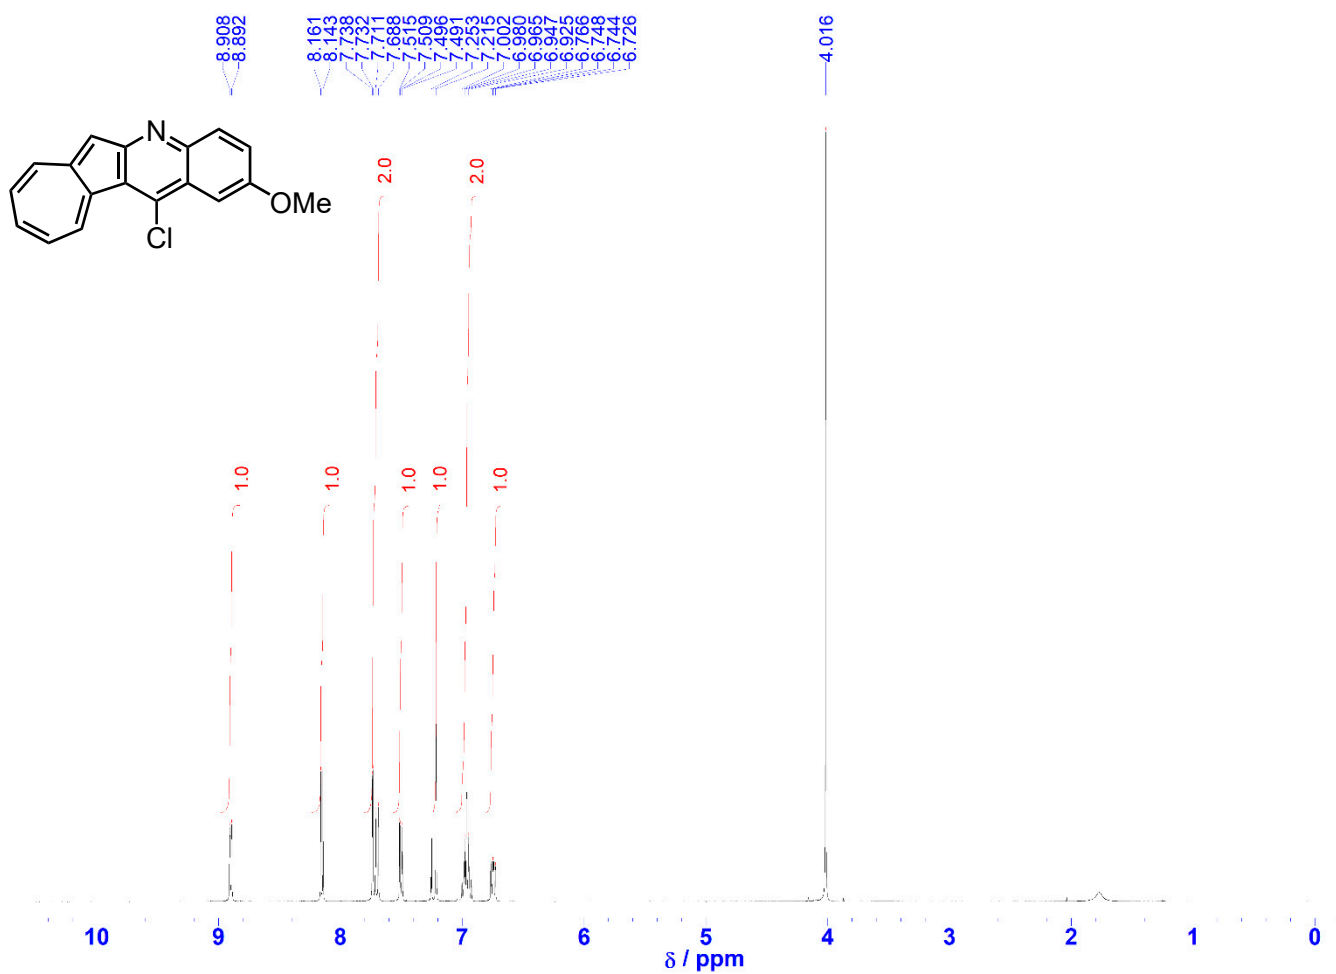

Figure S37. <sup>1</sup>H NMR spectrum of **4d** in CDCl<sub>3</sub> (500 MHz).

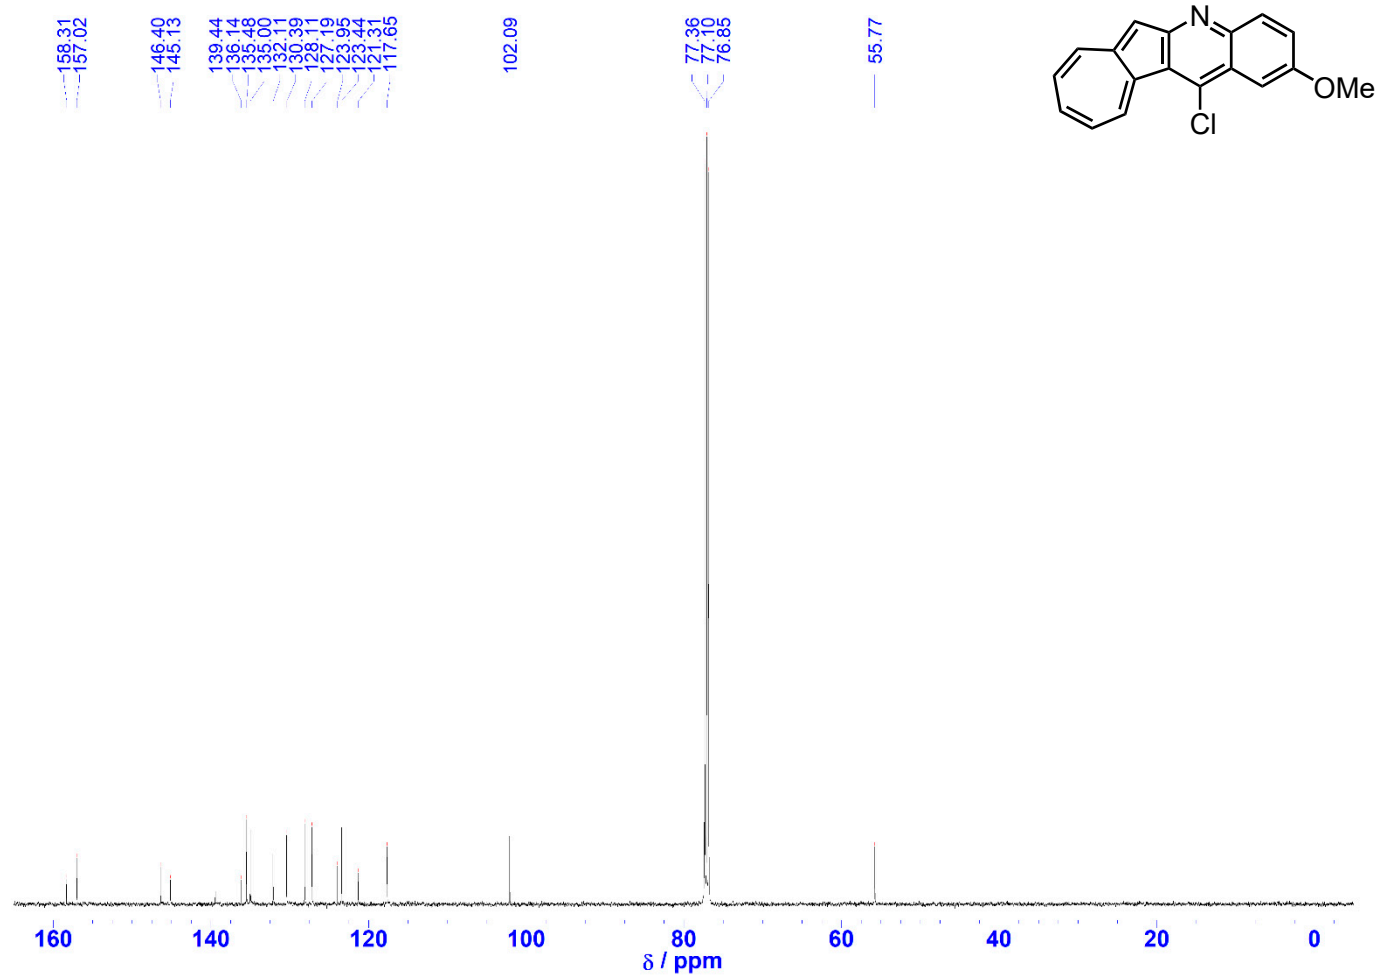

Figure S38.  $^{13}\text{C}$  NMR spectrum of **4d** in  $\text{CDCl}_3$  (125 MHz).

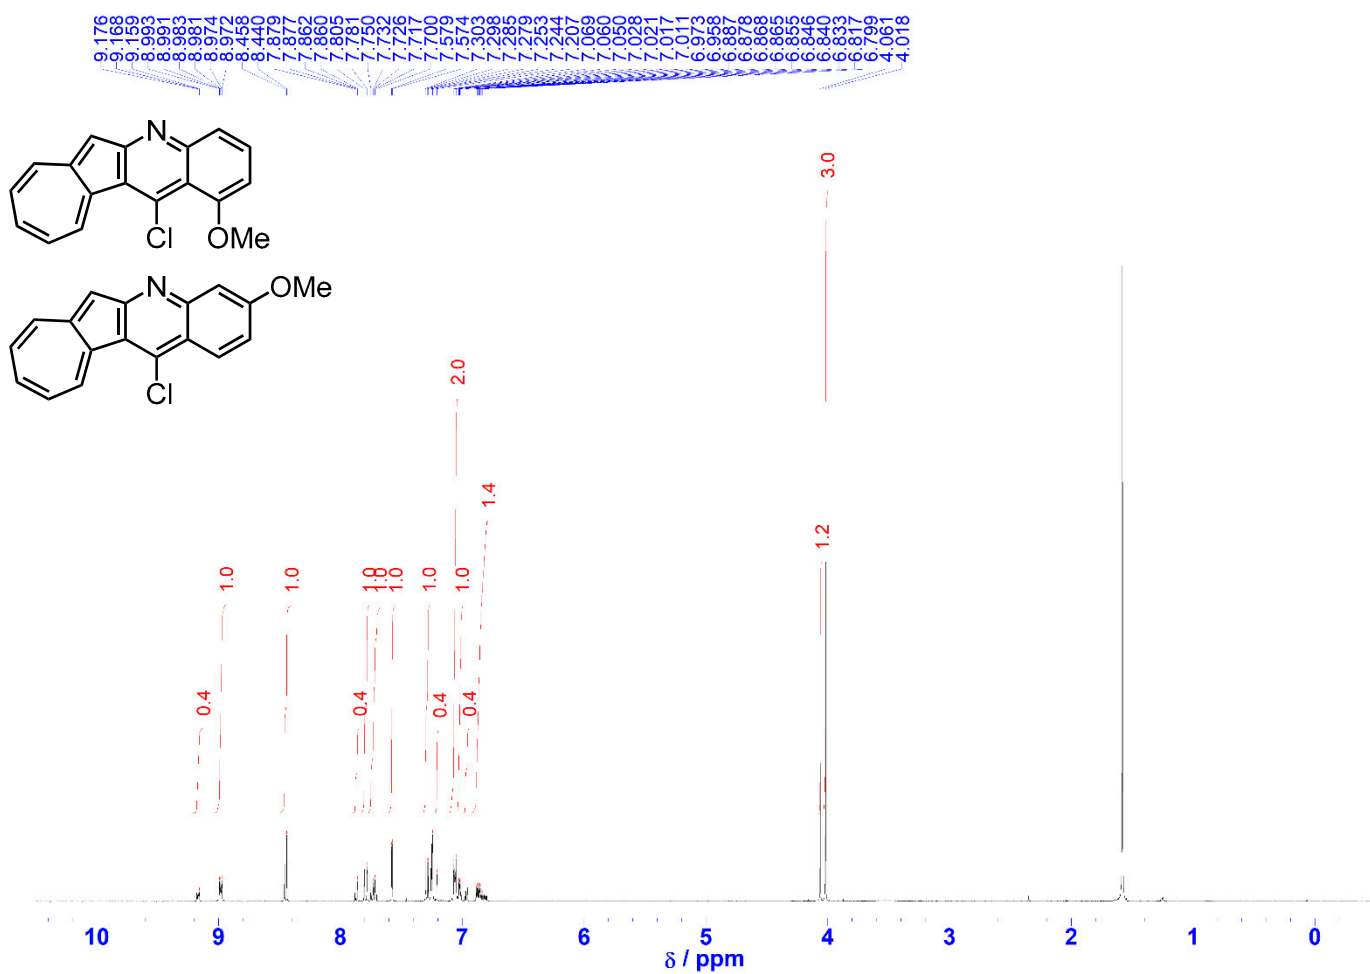

Figure S39.  $^1\text{H}$  NMR spectrum of **4e** and **4e'** in  $\text{CDCl}_3$  (500 MHz).

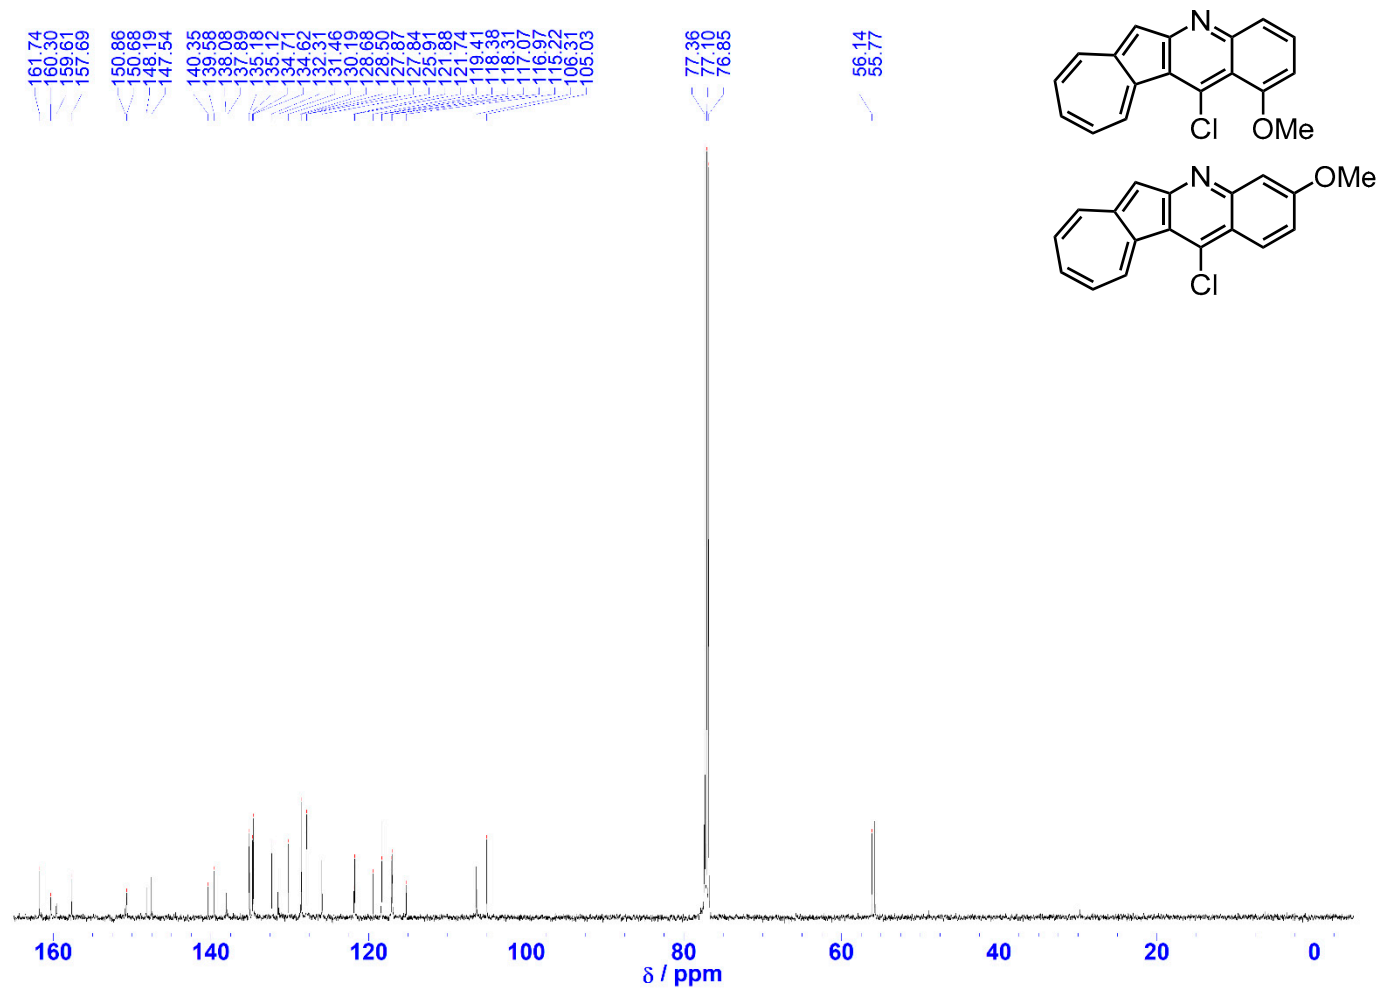

Figure S40.  $^{13}\text{C}$  NMR spectrum of **4e** and **4e'** in  $\text{CDCl}_3$  (125 MHz).

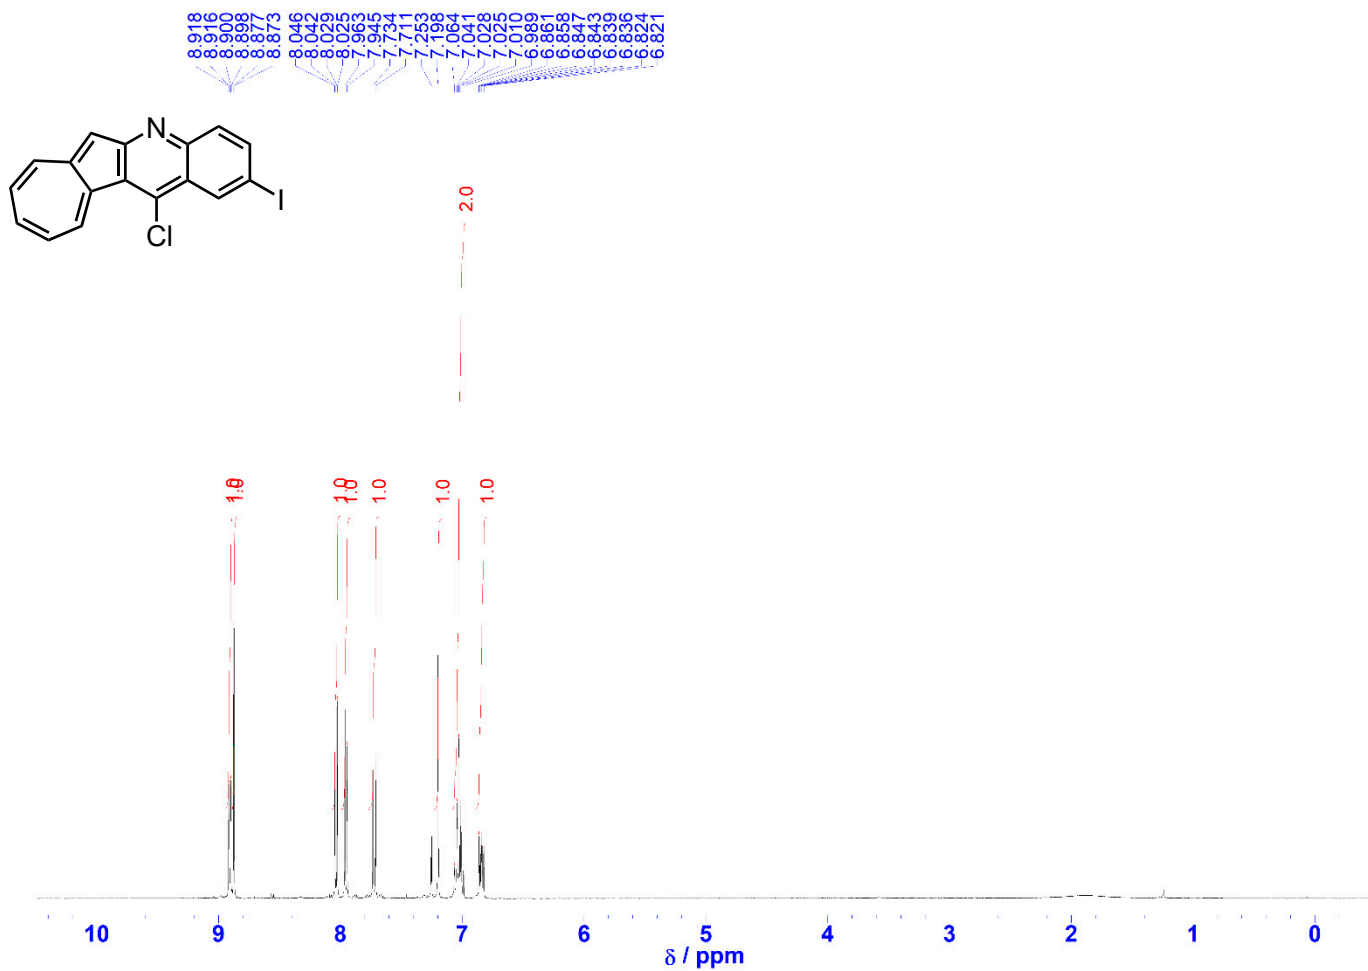

**Figure S41.** <sup>1</sup>H NMR spectrum of **4f** in CDCl<sub>3</sub> (500 MHz).

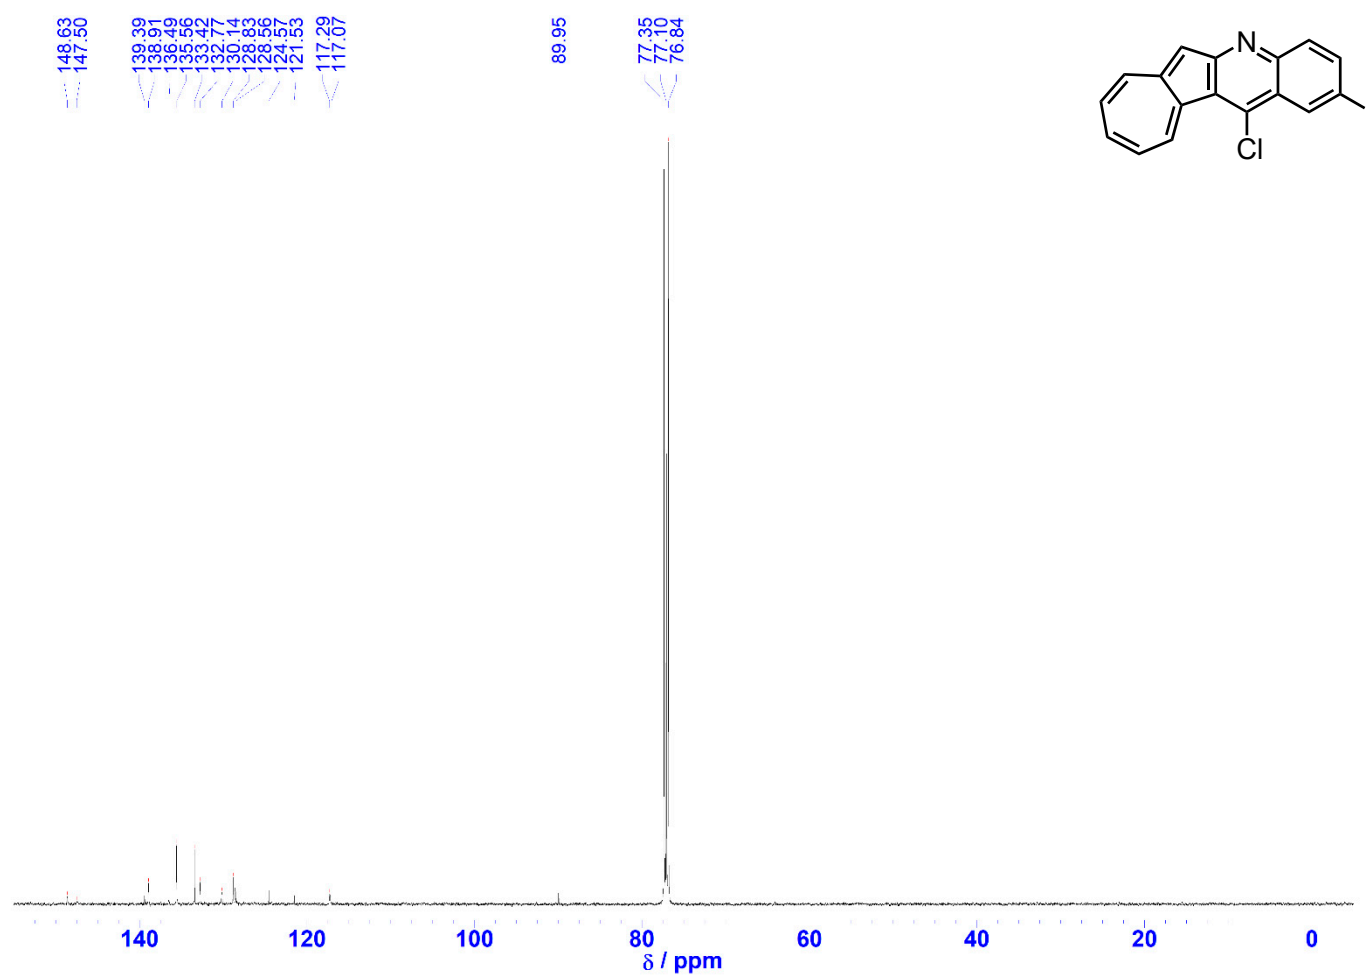

Figure S42.  $^{13}\text{C}$  NMR spectrum of **4f** in  $\text{CDCl}_3$  (125 MHz).

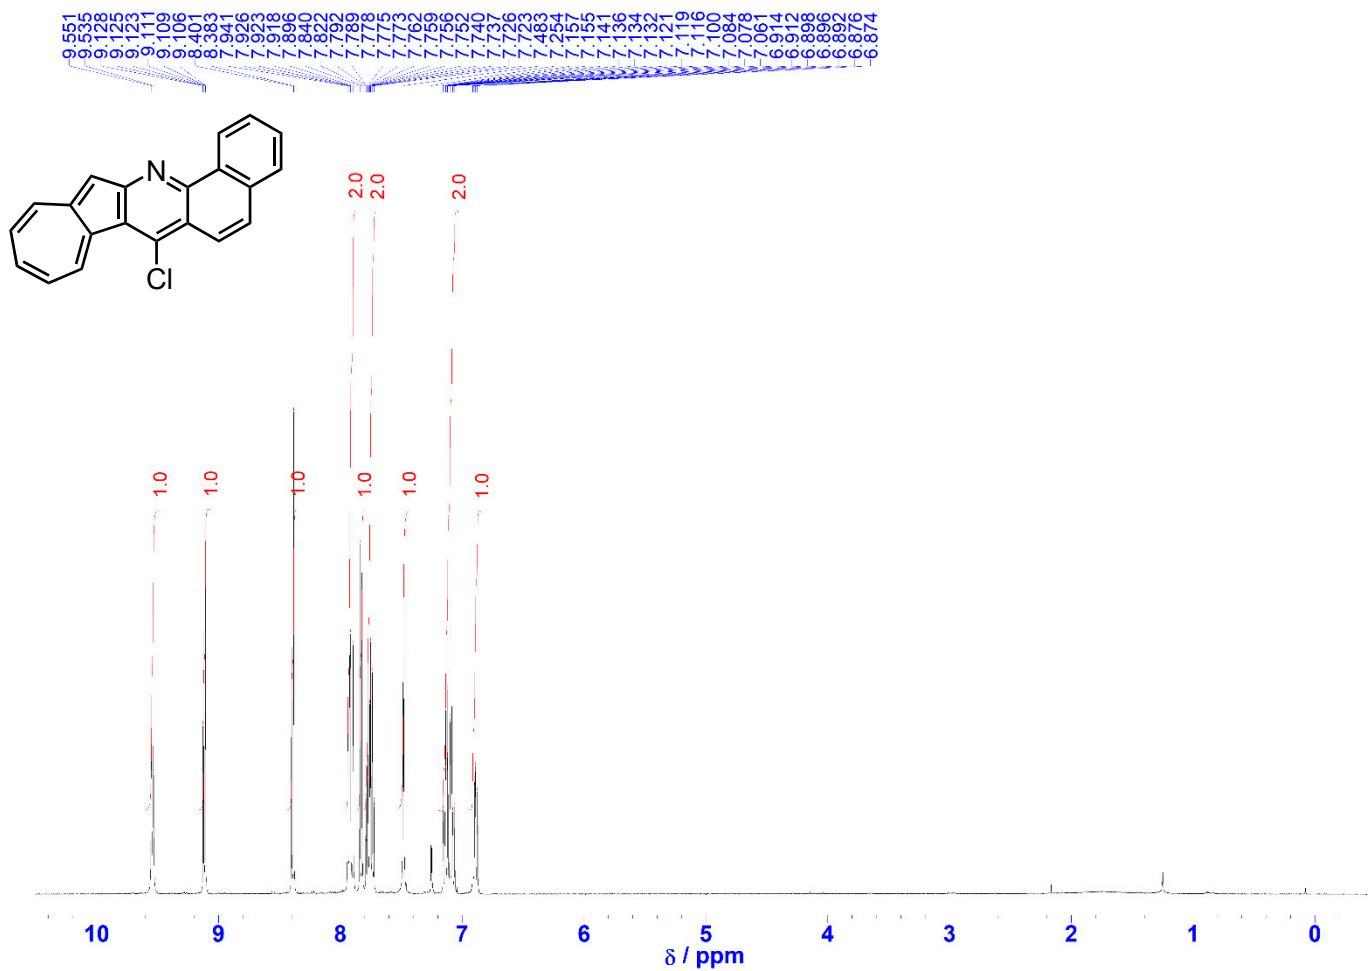

**Figure S43.**  $^1\text{H}$  NMR spectrum of **4g** in  $\text{CDCl}_3$  (500 MHz).

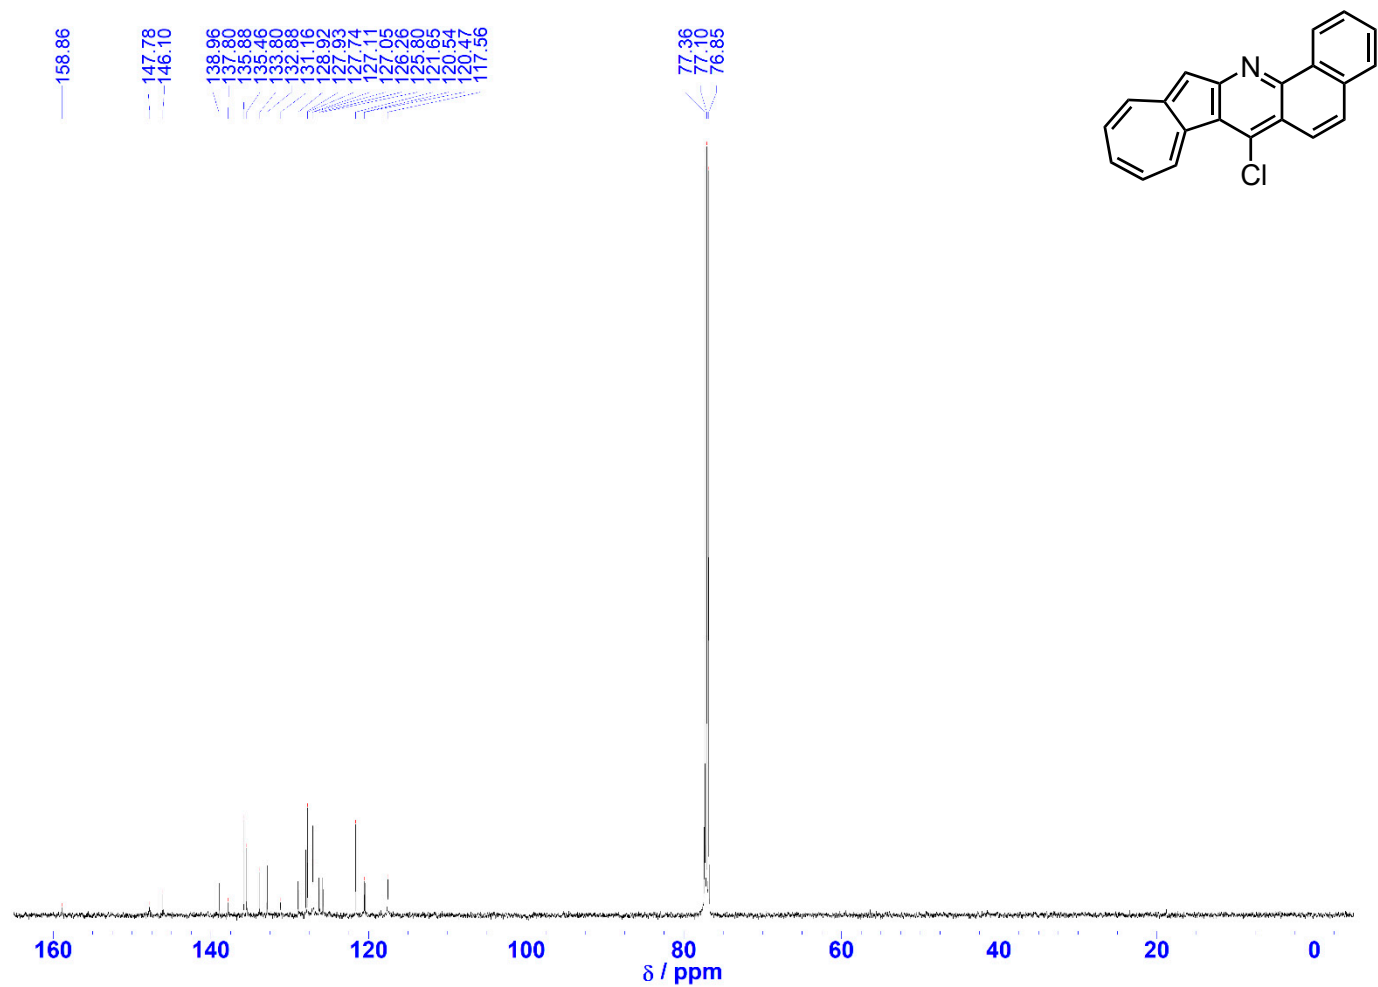

**Figure S44.**  $^{13}\text{C}$  NMR spectrum of **4g** in  $\text{CDCl}_3$  (125 MHz).

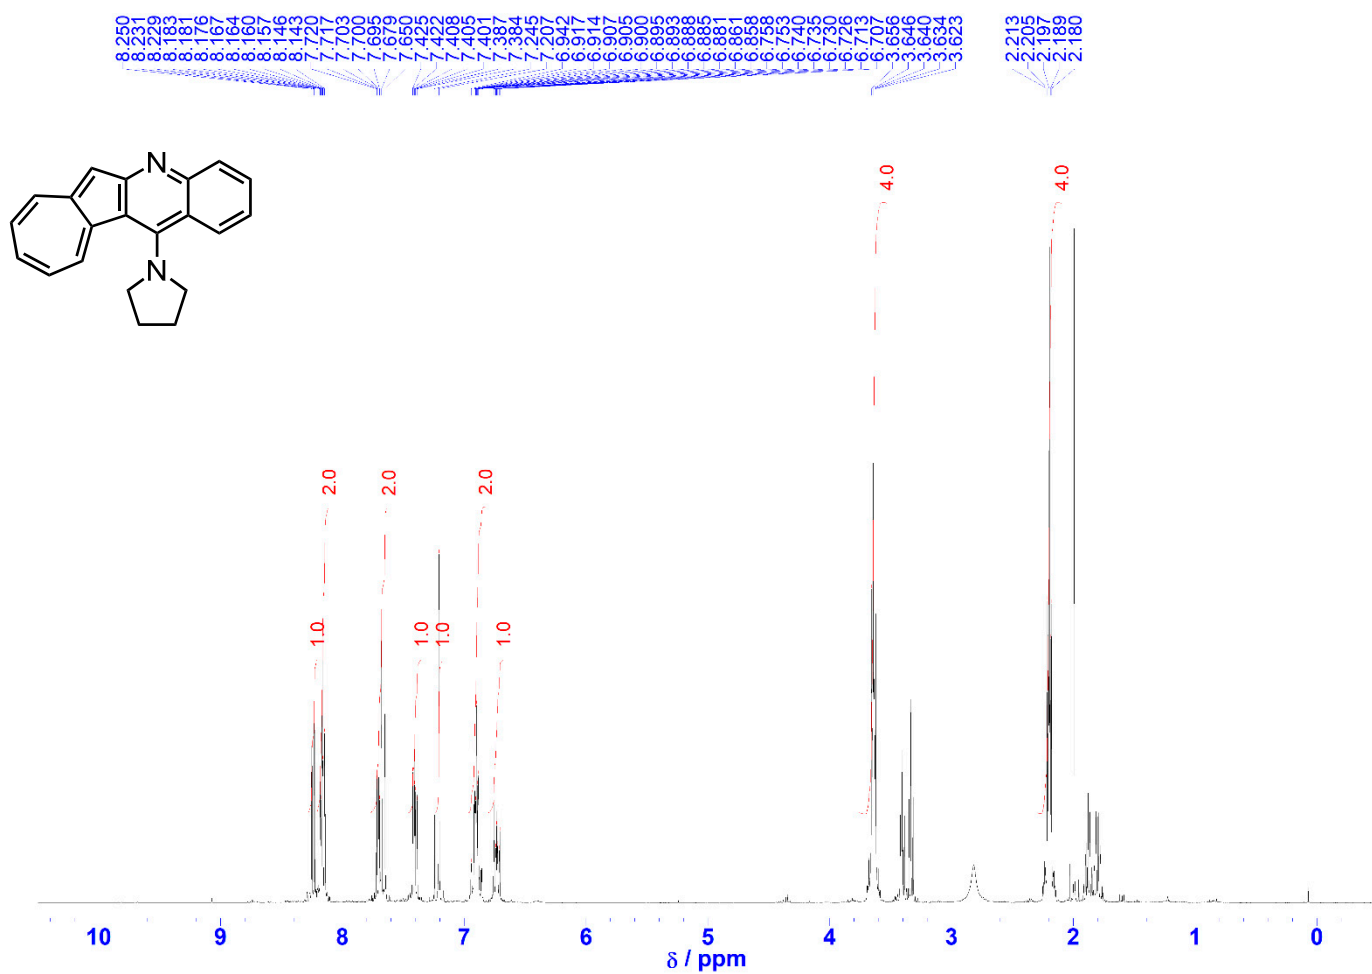

**Figure S45.**  $^1\text{H}$  NMR spectrum of **5a** in  $\text{CDCl}_3$  (500 MHz).

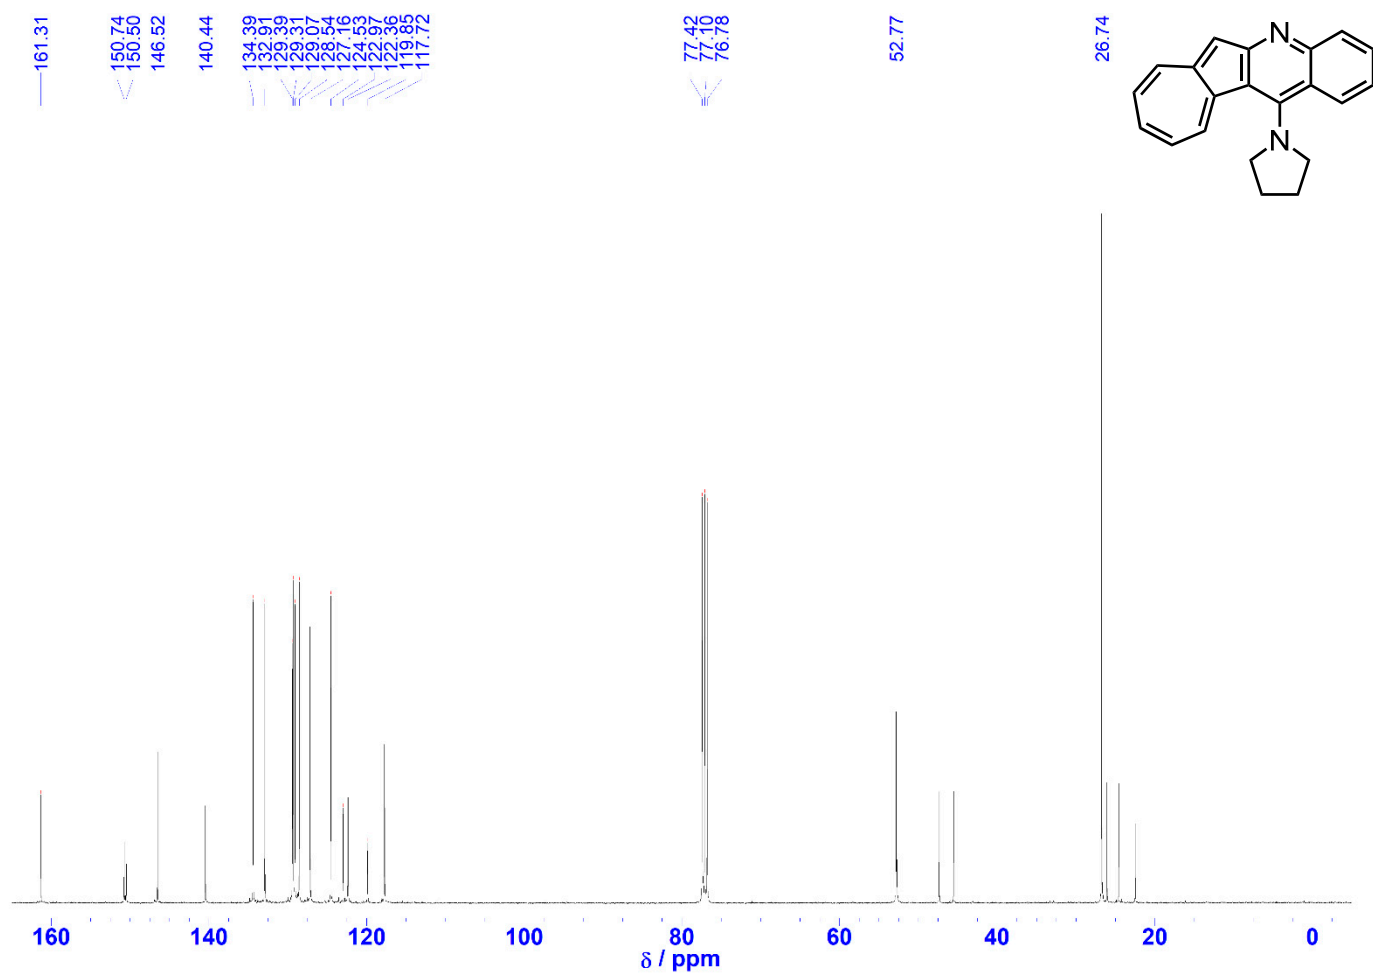

Figure S46.  $^{13}\text{C}$  NMR spectrum of **5a** in  $\text{CDCl}_3$  (125 MHz).

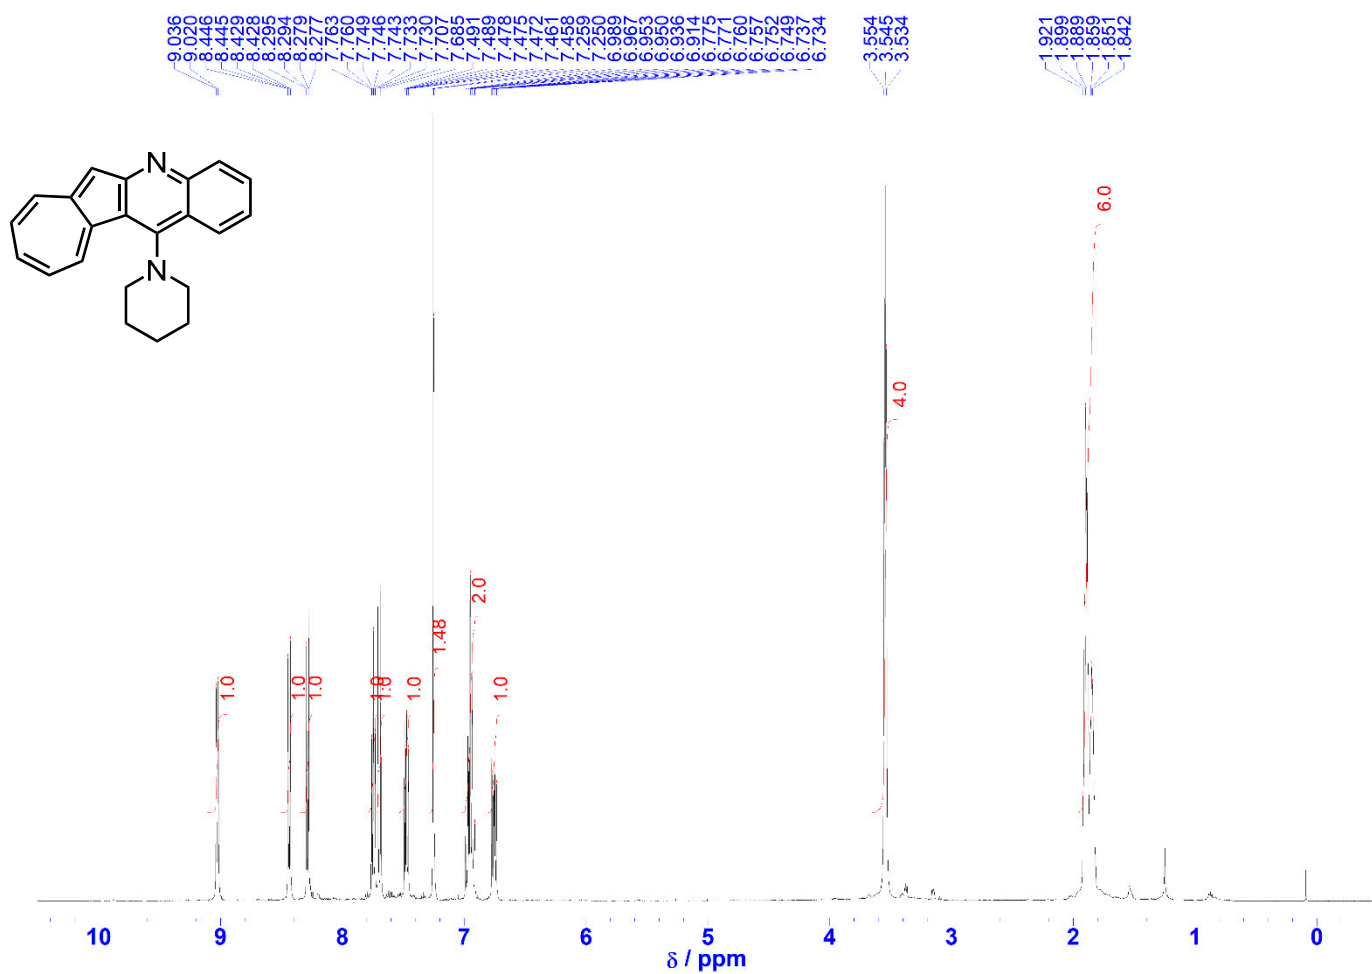

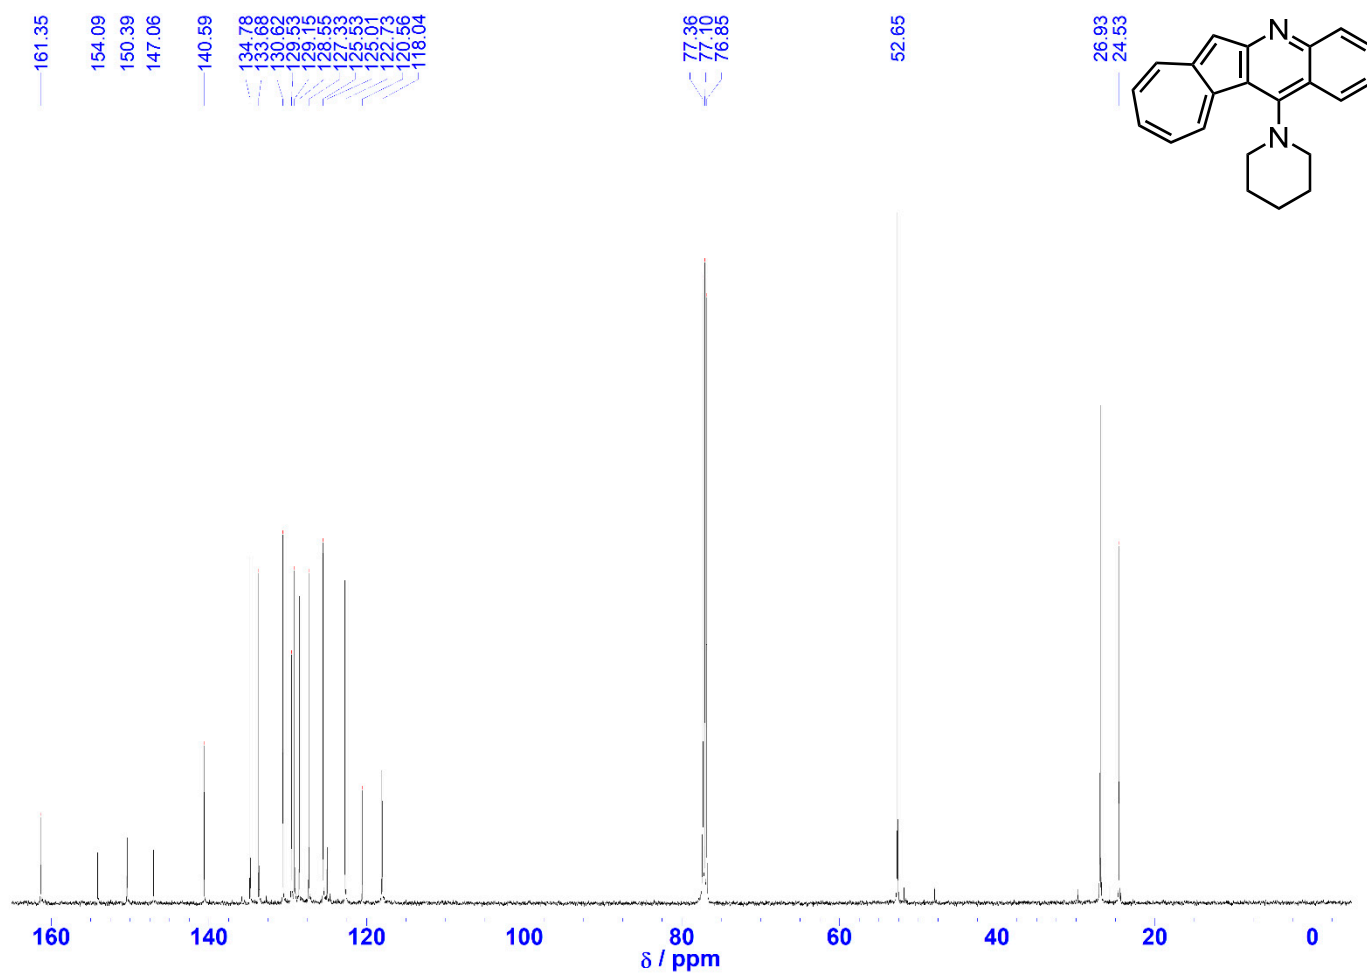

**Figure S48.**  $^{13}\text{C}$  NMR spectrum of **5a** in  $\text{CDCl}_3$  (125 MHz).

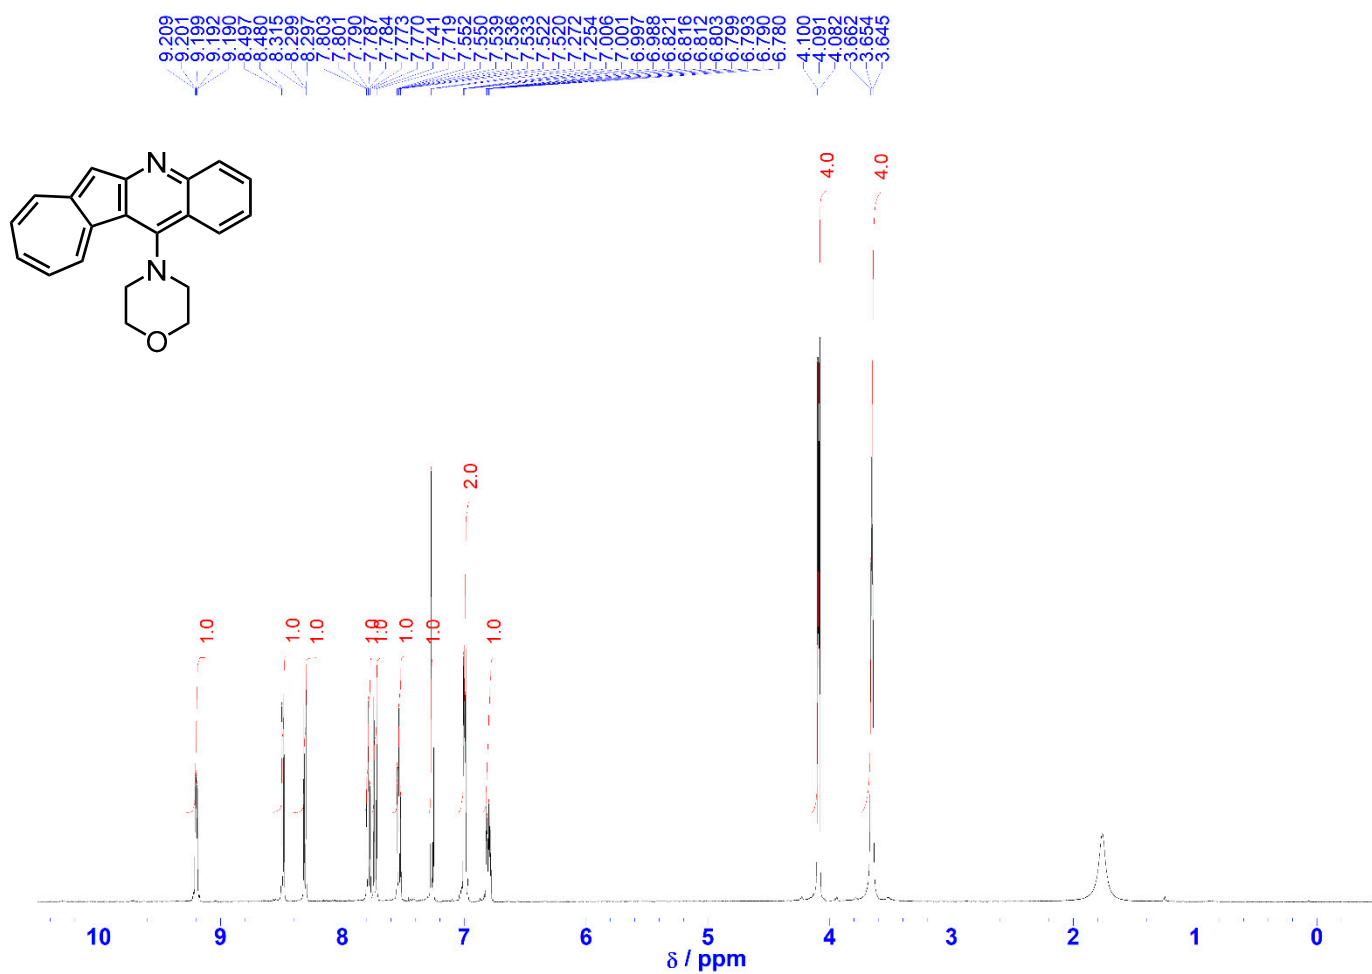

Figure S49.  $^1\text{H}$  NMR spectrum of **5a** in  $\text{CDCl}_3$  (500 MHz).

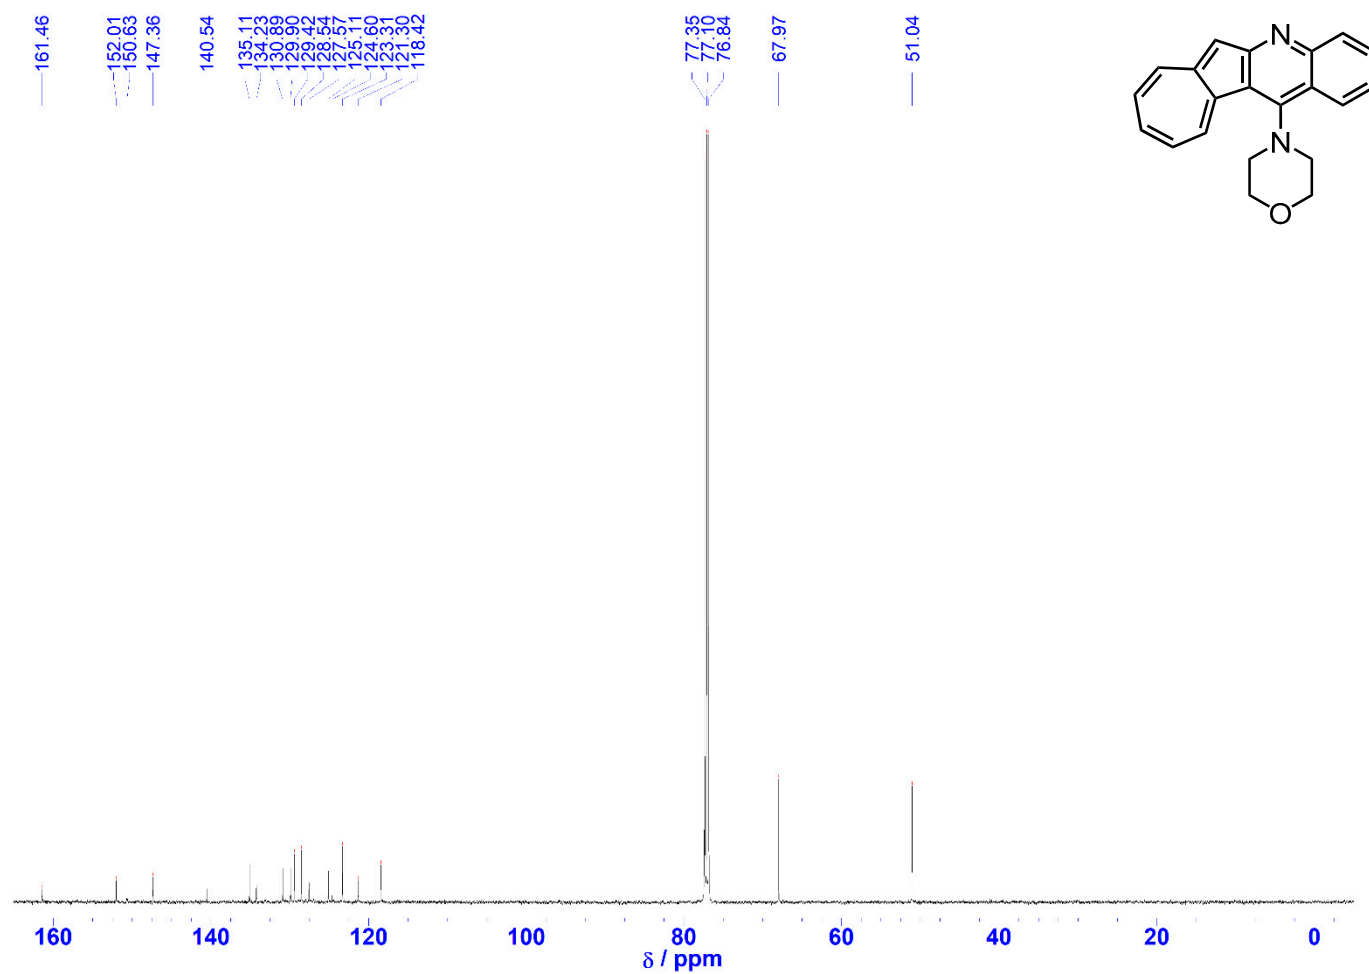

Figure S50.  $^{13}\text{C}$  NMR spectrum of **5a** in  $\text{CDCl}_3$  (125 MHz).
